# A global perspective on microbial diversity in the terrestrial deep subsurface

## Authors:

Soares, A.<sup>1,2,3</sup>, Edwards, A.<sup>2,3\*</sup>, An, D.<sup>4</sup>, Bagnoud, A.<sup>5</sup>, Bomberg, M.<sup>6</sup>, Budwill, K.<sup>7</sup>, Caffrey, S. M.<sup>8</sup>, Fields, M.<sup>9</sup>, Gralnick, J.<sup>10</sup>, Kadnikov, V.<sup>11,12</sup>, Momper, L.<sup>13</sup>, Osburn, M.<sup>14</sup>, Moreau, J.W.<sup>15</sup>, Moser, D.<sup>19</sup>, Mu, A.<sup>15,16,17,18</sup>, Purkamo, L.<sup>6,20,21</sup>, Rassner, S. M.<sup>1,3</sup>, Sheik, C. S.<sup>22</sup>, Sherwood Lollar, B.<sup>23</sup>, Toner, B. M.<sup>24</sup>, Voordouw, G.<sup>4</sup>, Wouters, K.<sup>26</sup>, Mitchell, A. C.<sup>1,3\*</sup>

## Affiliations:

1. Department of Geography and Earth Sciences (DGES), Aberystwyth University (AU), Wales, UK
2. Institute of Biology, Environmental and Rural Sciences (IBERS), AU
3. Interdisciplinary Centre for Environmental Microbiology (iCEM), AU
4. Department of Biological Sciences, University of Calgary, Canada
5. Institut de Génie Thermique (IGT), Haute École d'Ingénierie et de Gestion du Canton de Vaud (HEIG-VD), Yverdon-les-Bains, Switzerland
6. VTT Technical Research Centre of Finland, Finland
7. Alberta Innovates, Canada
8. University of Toronto, Canada (UT)
9. Center for Biofilm Engineering (CBE), Montana State University (MSU), USA
10. Department of Plant and Microbial Biology, UM, USA
11. Faculty of Biology, Moscow State University (MoSU), Russia
12. Institute of Bioengineering, Research Center of Biotechnology, Russian Academy of Sciences, Russia
13. Department of Earth, Atmospheric and Planetary Sciences (DEAPS), The Massachusetts Institute of Technology (MIT), United States of America (USA)
14. Department of Earth and Planetary Sciences (DEPS), Northwestern University (NWU), USA
15. School of Earth Sciences, The University of Melbourne (UM), Parkville, Australia
16. Department of Microbiology and Immunology at the Peter Doherty Institute for Infection and Immunity, UM
17. Doherty Applied Microbial Genomics, Department of Microbiology and Immunology at the Peter Doherty Institute for Infection and Immunity, UM

18. Microbiological Diagnostic Unit Public Health Laboratory, Department of Microbiology and Immunology, UM
19. Division of Hydrologic Sciences, Desert Research Institute (DRI), Las Vegas, NV, USA
20. School of Earth and Environmental Sciences (SEES), University of St. Andrews (USA), Scotland, UK
21. Geological Survey of Finland (GTK), Finland
22. Large Lakes Observatory, University of Minnesota – Duluth (UMD)
23. Department of Earth Sciences, UT, Canada
24. Department of Soil, Water & Climate, University of Minnesota
25. Institute for Environment, Health and Safety (EHS), Belgian Nuclear Research Centre SCK•CEN, Mol, Belgium

**\*Corresponding Authors:** AC Mitchell [nem@aber.ac.uk](mailto:nem@aber.ac.uk); A Edwards [aye@aber.ac.uk](mailto:aye@aber.ac.uk)

# Summary

While recent efforts to catalogue Earth's microbial diversity have focused upon surface and marine habitats, 12% to 20% of Earth's bacterial and archaeal biomass is suggested to inhabit the terrestrial deep subsurface, compared to ~1.8% in the deep subseafloor<sup>1-3</sup>. Metagenomic studies of the terrestrial deep subsurface have yielded a trove of divergent and functionally important microbiomes from a range of localities<sup>4-6</sup>. However, a wider perspective of microbial diversity and its relationship to environmental conditions within the terrestrial deep subsurface is still required. Here, we show the diversity of bacterial communities in deep subsurface groundwater is controlled by aquifer lithology globally, by using 16S rRNA gene datasets collected across five countries on two continents and from fifteen rock types over the past decade. Furthermore, our meta-analysis reveals that terrestrial deep subsurface microbiota are dominated by Betaproteobacteria, Gammaproteobacteria and Firmicutes, likely as a function of the diverse metabolic strategies of these taxa. Despite this similarity, evidence was found not only for aquifer-specific microbial communities, but also for a common small consortium of prevalent Betaproteobacteria and Gammaproteobacterial OTUs across the localities. This finding implies a core terrestrial deep subsurface community, irrespective of aquifer lithology, that may play an important role in colonising and sustaining microbial habitats in the deep terrestrial subsurface. An *in-silico* contamination-aware approach to analysing this dataset underscores the importance of downstream methods for assuring that robust conclusions can be reached from deep subsurface-derived sequencing data. Understanding the global panorama of microbial diversity and ecological dynamics in the deep terrestrial subsurface provides a first step towards understanding the role of microbes in global subsurface element and nutrient cycling.

# Main text

Understanding the distribution of microbial diversity is pivotal for advancing our knowledge of deep subsurface global biogeochemical cycles<sup>7,8</sup>. Subsurface biomass is suggested to have exceeded that of the Earth's surface by an order of magnitude (~45% of Earth's total biomass) before land plants evolved, at ca. 0.5 billion years ago<sup>9</sup>. Integrative modelling of cell count and quantitative PCR (qPCR) data and geophysical factors indicated in late 2018 that the bacterial and archaeal biomass found in the global deep subsurface may range from 23 to 31 petagrams of carbon (PgC). These values halved previous efforts from earlier that year<sup>10</sup> but maintained the notion that the terrestrial deep subsurface holds ca. 5-fold more bacterial and archaeal biomass than the deep marine

subsurface. Further, it is expected that 20-80% of the possible  $2\text{-}6 \times 10^{29}$  prokaryotic cells present in the terrestrial subterranean biome exist as biofilms and play crucial roles in global biogeochemical cycles<sup>10,11</sup>.

Cataloguing microbial diversity and functionality in the terrestrial deep subsurface has mostly been achieved by means of marker gene and metagenome sequencing in coals, sandstones, carbonates, and clays, as well as deep igneous and metamorphic rocks<sup>4-6,12-20</sup>. Only recently has the first comprehensive database of 16S rRNA gene-based studies targeting terrestrial subsurface environments been compiled<sup>10</sup>. This work focused on updating estimates for bacterial and archaeal biomass, and cell numbers across the terrestrial deep subsurface, but also linked the identified bacterial and archaeal phylum-level compositions to host-rock type, and to 16S rRNA gene region primer targets<sup>10</sup>. While highlighting Firmicutes and Proteobacterial dominance in the bacterial component of terrestrial deep subsurface, no further taxonomic insights were gained. However, genus-level identification is critical for understanding community composition, inferred metabolism and hence microbial contributions of distinct community members to biogeochemical cycling in the deep subsurface<sup>18,21-23</sup>. Indeed, such genus-specific traits have been demonstrated as critical for understanding crucial biological functions in other microbiomes<sup>24</sup>, and genus-specific functions of relevance for deep subsurface biogeochemistry are clear<sup>25,26</sup>.

So far, the potential biogeochemical impacts of microbial activity in the deep subsurface have been inferred through shotgun metagenomics, as well as from incubation experiments of primary geological samples amended with molecules or minerals of interest<sup>13,19,20,27-30</sup>. Recent studies of deep terrestrial subsurface microbial communities further suggest that these are metabolically active, generally associated with novel uncultured phyla, and potentially directly involved in carbon and sulphur cycling<sup>31-36</sup>. Concomitant advancements in subsurface drilling, molecular methods and computational techniques have aided the exploration of the subsurface biosphere, but serious challenges remain mostly related to deciphering sample contamination by drilling methods and sample transportation to laboratories for processing<sup>37,38</sup>. The logistical challenges inherent to accessing and recovering *in situ* samples from hundreds to thousands of metres below surface complicate our view of terrestrial subsurface microbial ecology<sup>39</sup>.

In this study, we capitalize on the increased availability of 16S rRNA gene amplicon data from multiple studies of the terrestrial deep subsurface conducted over the last decade. We apply bespoke bioinformatic scripts to generate insights into the microbial community structure and controls upon bacterial microbiomes of the terrestrial deep subsurface across a large distribution of habitat types on

multiple continents. The deep biosphere is as-yet undefined as a biome - elevated temperature, anoxic conditions, low levels of organic carbon, and measures of isolation from the surface photosphere are some of the criteria used albeit without a consensus. For this work a more general approach has been taken to define the terrestrial deep subsurface as the zone at least 100 m from the surface<sup>40,41</sup>.

### ***Meta-analysis of the terrestrial deep subsurface microbiome***

Here, we were able to compare datasets encompassing different 16S rRNA gene hyper-variable regions, and derived from different DNA extraction methodologies, facilitated by closed-reference Operational Taxonomic Unit (OTU)-picking of each study individually using the same 16S rRNA gene reference database. This procedure begins to address technically confounding variables by limiting taxonomy assignments to only the archaeal and bacterial diversity listed in the chosen database and precludes the discovery of novel taxa.

The finalized meta-analysis dataset comprised of 16S rRNA data from seventeen aquifers in either sedimentary- or crystalline-host rocks, from depths spanning 94 m to 2300 m below land surface (mbls), targeting mostly groundwater across 5 countries and two continents (**Supplementary Table 3**). Nine DNA extraction techniques were used in these studies, ranging from standard and modified kit protocols (e.g. MOBIO® PowerSoil, see **Table 1**) to phenol-chloroform and CTAB/NaCl based methods<sup>42–47</sup>. Finally, 6 different primer pair amplified regions of the 16S rRNA gene, in 454 pyrosequencing and Illumina sequencing, were used to generate the datasets.

**Table 1.** Metadata table for the studies utilized in this meta-analysis (*cf.* **Supplementary Table 3** and **Supplementary Figure 3** for more details). NA is used as an acronym for “not available”. The dataset unavailable through SRA is available through <http://hmp.ucalgary.ca/HMP/>.

| SRA Accession | Originator                    | DOI                        | Year of Sampling | Final no. of samples | Location                         | Depth gradient (m) | Host-rock                                             | Final no. of sequences | Final no. of OTUs |
|---------------|-------------------------------|----------------------------|------------------|----------------------|----------------------------------|--------------------|-------------------------------------------------------|------------------------|-------------------|
| PRJNA262938   | Magdalena Osburn, Lily Momper | 10.3389/fmicb.2014.00610   | 2013/2014        | 6                    | South Dakota, USA                | 243.84-1478.28     | Sulphide-rich schists                                 | 170364                 | 1367              |
| PRJNA268940   | Duane Moser                   | NA                         | 2007-2011        | 8                    | California, USA; Ontario, Canada | 94-2383            | Dolomite, Tuff, Rhyolite/tuff-breccia                 | 68071                  | 741               |
| PRJNA248749   | Jeffrey Gralnick              | NA                         | 2011             | 6                    | Minnesota, USA                   | 730                | Hematite                                              | 69757                  | 511               |
| PRJNA251746   | Rick Colwell                  | NA                         | 2009             | 6                    | Washington, USA                  | 393-1135           | Basalt                                                | 30121                  | 613               |
| PRJNA375701   | Elliot Barnhart               | 10.1016/j.coal.2016.05.001 | 2013             | 5                    | Montana, USA                     | 109-114.7          | Sub-bituminous coal, Shale, Sandstone, Siltstone      | 35926                  | 154               |
| NA            | Karen Budwill                 | 10.1128/AEM.01737-15       | 2009             | 38                   | Alberta, Canada                  | 140-1064.4         | Sub-bituminous coal, Volatile bituminous coal         | 100618                 | 5110              |
| PRJEB1468     | Katinka Wouters               | 10.1111/1574-6941.12171    |                  | 6                    | Mol, Belgium                     | 217-232            | Kaolinite/illite and smectite                         | 47123                  | 497               |
| PRJEB10822    | Lotta Purkamo                 | 10.5194/bg-13-3091-2016    | 2009-2011        | 7                    | Outokumpu, Finland               | 180-2300           | Mica-schist, Biotite-gneiss, Chlorite-sericite schist | 12290                  | 177               |

141

142 Initial processing of 187 retrieved samples revealed 24,632,035 chimera-checked sequences  
 143 17,28,43,44,48–50. SILVA 123-aided closed-reference OTU-picking yielded 6,975 OTUs associated to  
 144 598,341 sequences following exclusion of singleton OTUs and samples containing 2 or less OTUs.  
 145 The final dataset following stricter contamination-aware filtering (*cf.* **Methodology**) was comprised  
 146 of 70 samples and 2,207 OTUs (513,929 sequences, 2.54% of the initial sequences), where Archaeal  
 147 reads comprised 1.5% of the total number of reads.

148

## 149 *Trends in taxonomic diversity*

150 Among a total of 45 detected bacterial phyla, Proteobacteria were seen to dominate most community  
 151 profiles in this dataset (**Figure 1**). The most abundant proteobacterial classes (Alpha-,  
 152 Betaproteobacteria, Delta-, Gammaproteobacteria) represented 57.2% of the total number of reads,  
 153 with 13.4% of these assigned to class Clostridia (Firmicutes). A general prevalence of  
 154 Betaproteobacteria and Gammaproteobacteria in the deep biosphere may be explained by the diverse  
 155 metabolic capabilities of taxa within these clades. Families Gallionellaceae, Pseudomonadaceae,  
 156 Rhodocyclaceae and Hydrogeniphillaceae within Betaproteobacteria and Gammaproteobacteria are  
 157 suggested to play crucial roles in deep subsurface iron, nitrogen, sulphur and carbon cycling across  
 158 the world<sup>43,51,52</sup>. The relative abundance of order Burkholderiales (Betaproteobacteria) in surficial  
 159 soils has previously been correlated ( $R^2=0.92$ , ANOVA p-value <0.005) with mineral dissolution  
 160 rates, while genus *Pseudomonas* (Gammaproteobacteria) is widely known to playing a key role in  
 161 hydrocarbon-degradation, denitrification and coal solubilisation in different locations<sup>53–55</sup>.

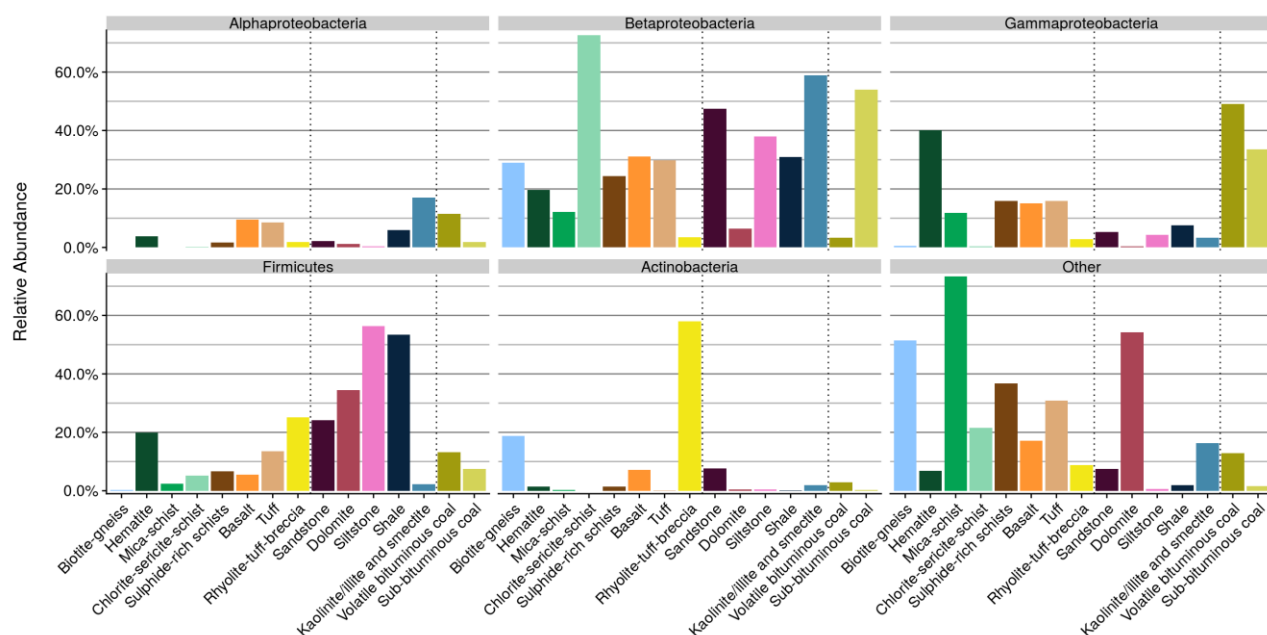

162

163 **Figure 1.** Mean relative abundances (% , y-axis) of the most abundant taxonomic groups across the  
 164 dataset across all analysed aquifer lithologies (x-axis). Vertical dashed lines divide crystalline and

sedimentary rocks. Coals ranks are also separated due to their higher sample contribution to the dataset.

Mean grouped proportion values indicated that Betaproteobacteria were the most abundant proteobacterial class in most host rocks, representing 26.1% of all reads in the dataset. While Betaproteobacteria accounted for 53.96% of the community profile for sub-bituminous coals, Gammaproteobacteria dominated volatile bituminous coals (49.1% of the profile, **Figure 1**). The dominance of Betaproteobacteria and Gammaproteobacteria in coals builds on culture-based evidence of widespread degradation of coal-associated complex organic compounds by these classes<sup>56–59</sup>.

Firmicutes were represented in large part by class Clostridia and mostly associated with sedimentary aquifers (i.e. sandstone, dolomite, siltstone, shale – **Figure 1**). This class includes ubiquitous anaerobic hydrogen-driven sulphate reducers also known to sporulate and metabolize a wide range of organic carbon compounds that have been found to dominate extremely deep subsurface ecosystems beneath South Africa and likely globally given the pervasive high levels of H<sub>2</sub> in similar geologic settings<sup>13,60–62</sup>. Clostridia from metagenomes have been detected from the terrestrial deep subsurface and inferred to have the physiological capabilities needed to thrive in these environments<sup>20</sup>. Adaptation to extreme environments in Clostridia is posed to be driven by varied metabolic potential, sporulation ability, and capacity for CO<sub>2</sub>- or sulphur-based autotrophic H<sub>2</sub>-dependent growth<sup>22,63</sup>.

### ***Lithological controls on community structure***

Microbial community structure and composition in soils depend on fine-tuned geochemical, physical and hydrogeological conditions that influence microbial presence and metabolism<sup>64</sup>. This relationship also appears to be reflected in the global subsurface, where host-rock lithology is evident as a primary control on community structure (**Figures 2 and 3**). Indeed, most host-rocks (10 out of 15 in this dataset) have, on average, more unique OTUs than they share with other host-rocks (**Figure 2**). Particularly, in sulphide-rich schists, 73% of the OTUs are, on average, unique to the host-rock. The role of host-rock lithology is further evidenced (**Figure 3**) as some of the host-rocks clustered at a 95% confidence interval, suggesting closely related microbial communities within similar lithologies, despite other environmental factors such as depth or location. Further, 50.6% of Jensen-Shannon distances ordinated (**Figure 3**) were significantly explained by aquifer lithology (ADONIS/PERMANOVA, F-statistic=4.65, p-value <0.001, adjusted Bonferroni correction p-value <0.001); thus showing that rock type was the primary variable defining microbial community



200 structure. Other environmental features such as absolute sample depth and medium-scale location  
201 (i.e. state, region of the sampling site) explained only 3.08% and 2.78% of the significant metadata-  
202 driven variance in microbial community structure, respectively (ADONIS/PERMANOVA, F-  
203 statistic=3.95, 3.57 p-value <0.001, adjusted Bonferroni correction p-value <0.001). This suggests  
204 that depth-related changes in temperature and pressure are not significant controls on community  
205 structure. The relationship of community structure to hydrogeochemical parameters remains an area  
206 for future investigation – since hydrogeology and fluid geochemistry are also strongly controlled by  
207 lithology via water-rock reactions.

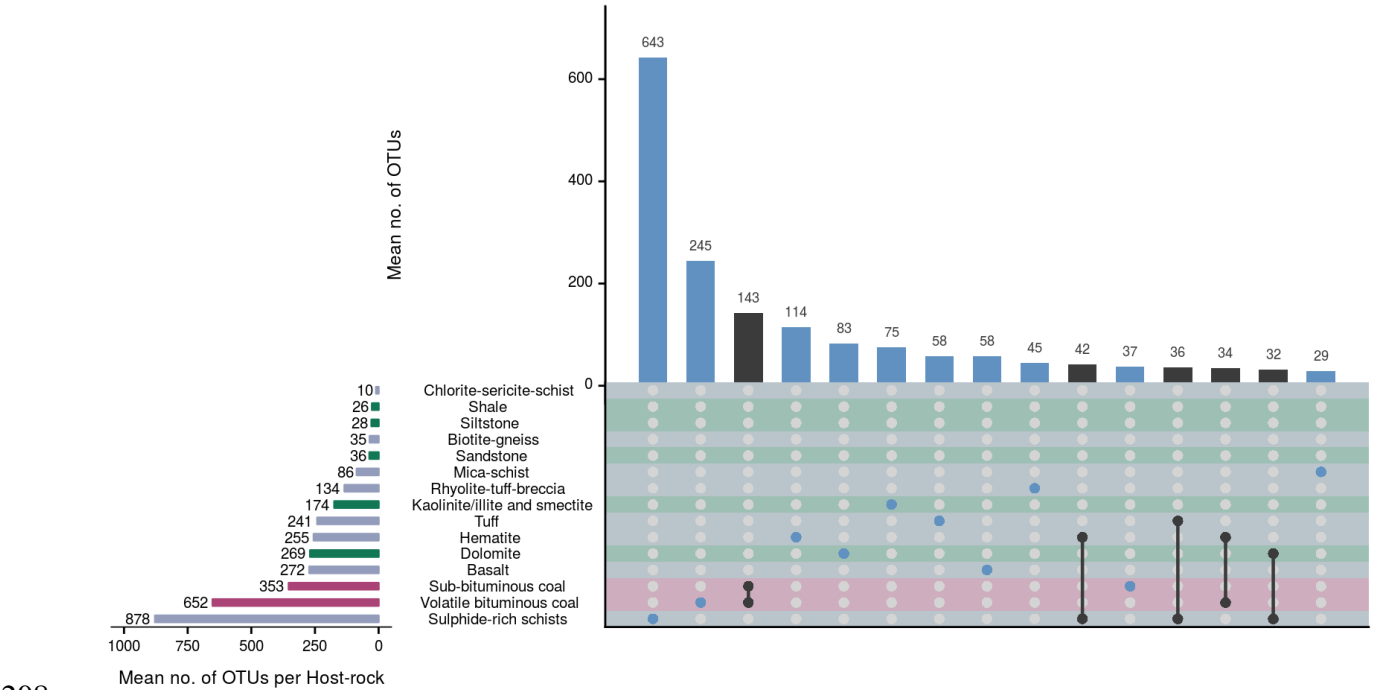

208 **Figure 2.** UpsetR plot of mean numbers of OTU interactions among rock types. Only interactions  
209 involving 25 or more OTUs on average are shown. Coloured matrix rows correspond to host-rocks,  
210 and are coloured according to rock type: blue for crystalline, green for sedimentary rocks and pink  
211 for coals, which were highlighted due to their higher sample contribution to the dataset. Columns  
212 depict OTU interactions: blue dots mark independent (mean number of non-shared OTUs)  
213 interactions and black dots connected by black lines mark shared OTUs between two or more host-  
214 rocks. Shared interactions are composed of only the host-rocks marked by dots. Vertical bars on top  
215 of the coloured matrix correspond to mean OTU numbers present in the described interactions and  
216 are coloured black or blue if depicting shared or non-shared interactions, respectively. Horizontal  
217 bars by the left of the coloured matrix depict mean total numbers of OTUs per host-rock.

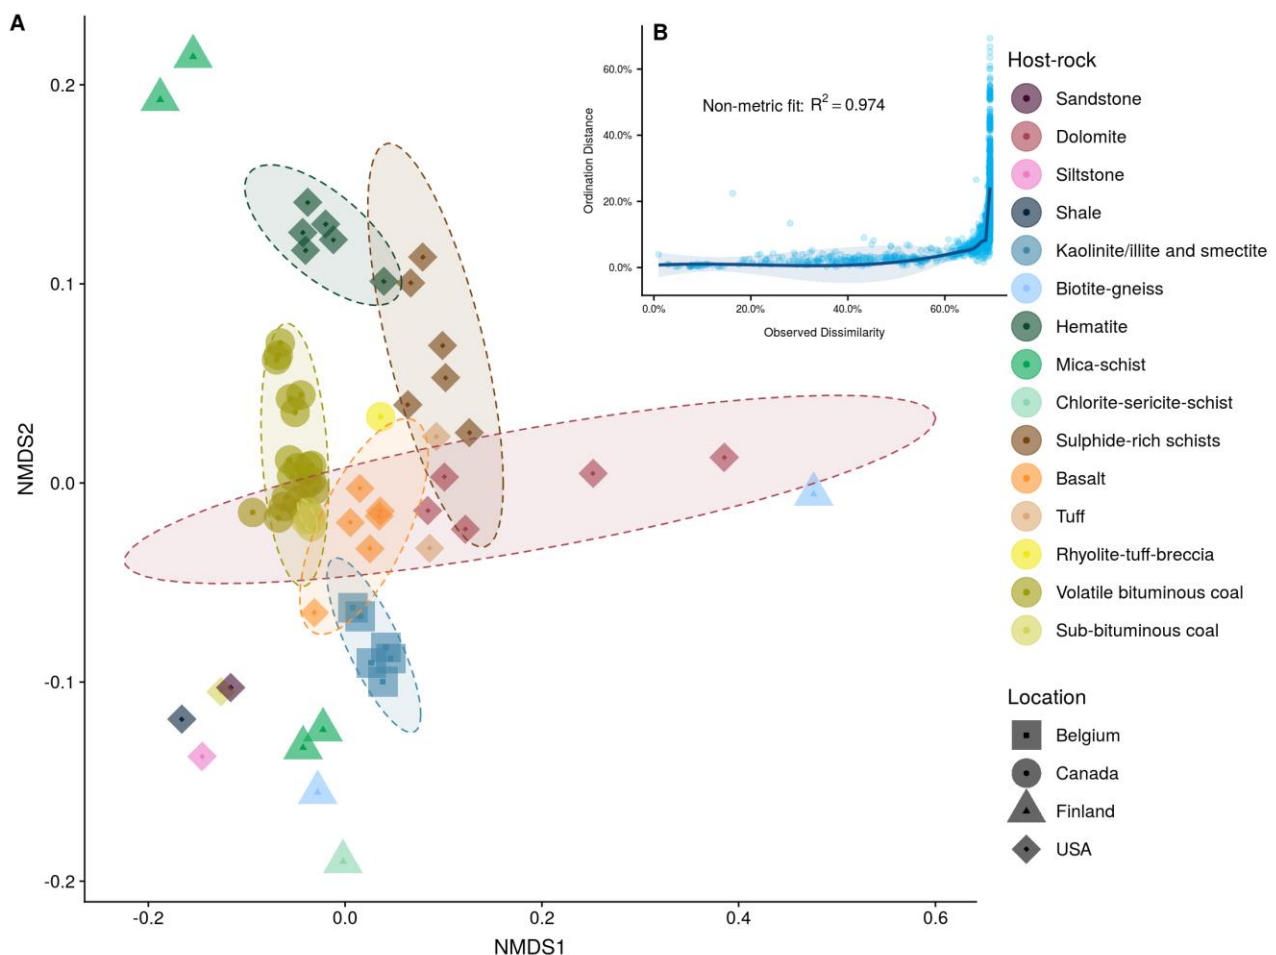

**Figure 3.** Non-metric Multidimensional Scaling (nMDS) of Jensen-Shannon distances between samples (A). Shapes correspond to different locations, whereas colours depict host-rocks targeted in this study. B depicts a Shepard's stress plot of observed (original) dissimilarities and ordination distances. An  $R^2$  measure of stress is further shown for the non-metric fit of the variables. Confidence interval ellipses were plotted at a level of 95% according to host-rock.

Metadata variables that were unavailable for all samples in the dataset were excluded from the statistical analyses, thus further insights into the significance of other environmental variables was not possible. Nevertheless, this is the first large-scale evidence that deep subsurface microbial community taxonomy appears host-rock-specific. Given the importance of chemolithotrophic metabolisms in dark, subsurface environments, the unique chemical and mineralogical compositions within different aquifer lithologies impart strong controls over microbiomes associated with mineral surfaces and porewaters<sup>43,62,65–67</sup>. Indeed, direct utilisation of mineral surfaces or dissolved species from minerals for respiration and/or metabolism has been shown to be critical in localised subsurface environments<sup>30,35,68,69</sup>. Due to low numbers of samples for some host-rock lithologies in this dataset (e.g. one sample each for siltstone, sandstone, shale and chlorite-sericite-schist), it is not possible to ascertain that microbiome specificity is generalisable to all deep subsurface aquifer types on Earth

(see **Figure 3**). Nevertheless, this study provides the first large-scale evidence that, at a global scale, lithology surpasses depth in shaping deep subterranean microbial communities.

### ***A core terrestrial deep subsurface microbial community?***

Analysis of prevalence across the dataset revealed that seven OTUs, all affiliated to genus *Pseudomonas*, were present in more than 25 and up to 41 samples (see **Supplementary Figure 1, Supplementary Table 2**). Network analysis (**Table 2**) highlighted a *Pseudomonas* OTU highly connected to other OTUs in the dataset. Further, BLAST<sup>70</sup> results indicated that recovered sequences for OTUs affiliated to this genus were generally associated to marine and terrestrial soil and sediments (*cf* **Supplementary Table 4, Supplementary Figure 4**). Four OTUs affiliated to Burkholderiales (Betaproteobacteria), the second most prevalent order in the dataset, were also found to be connected to up to 34 other OTUs. Genus *Thauera* (Betaproteobacteria, Rhodocyclales), represented by a single OTU, was the second most central to the dataset. Finally, network and prevalence analysis highlighted the putative importance classes Betaproteobacteria and Gammaproteobacteria may have in the deep subsurface, since taxa affiliated to these were highly connected across the dataset (**Table 2**). These observations suggest genus-level taxonomy may be relevant to shaping subterranean microbial communities irrespective of host-rock lithology.

255 **Table 2.** Top 10 most central OTUs in the Jaccard distances network (as defined by eigenvector centrality scores, or the scored value of the centrality of  
 256 each connected neighbour of an OTU) and correspondent closeness centrality (scores of shortest paths to and from an OTU to all the remainder in a  
 257 network) and degree (number of directly connected edges, or OTUs) values.

| OTU ID          | OTU Classification                                                                             | Centrality | Closeness | Degree |
|-----------------|------------------------------------------------------------------------------------------------|------------|-----------|--------|
| EF554871.1.1486 | Proteobacteria; <b>Gammaproteobacteria</b> ; Pseudomonadales; Pseudomonadaceae; Pseudomonas    | 1.0000000  | 2.13e-05  | 38     |
| HH792638.1.1492 | Proteobacteria; <b>Betaproteobacteria</b> ; Rhodocyclales; Rhodocyclaceae; Thauera             | 0.9753542  | 2.13e-05  | 36     |
| HQ681977.1.1496 | Proteobacteria; <b>Betaproteobacteria</b> ; Burkholderiales; Comamonadaceae; Diaphorobacter    | 0.9445053  | 2.13e-05  | 34     |
| KF465077.1.1336 | Proteobacteria; <b>Betaproteobacteria</b> ; Burkholderiales; Comamonadaceae; Acidovorax        | 0.8887751  | 2.13e-05  | 30     |
| JQ072853.1.1348 | Proteobacteria; <b>Betaproteobacteria</b> ; Rhodocyclales; Rhodocyclaceae; Thauera             | 0.8808435  | 2.13e-05  | 30     |
| KM200734.1.1449 | Proteobacteria; <b>Alphaproteobacteria</b> ; Rhizobiales; Rhizobiaceae; Rhizobium              | 0.8716886  | 2.13e-05  | 31     |
| KC758926.1.1392 | Proteobacteria; <b>Betaproteobacteria</b> ; Burkholderiales; Comamonadaceae; Acidovorax        | 0.8662805  | 2.13e-05  | 29     |
| FJ032194.1.1456 | Proteobacteria; <b>Betaproteobacteria</b> ; Burkholderiales; Comamonadaceae; Rhodoferax        | 0.8662805  | 2.13e-05  | 29     |
| EU771645.1.1366 | <b>Firmicutes</b> ; Bacilli; Bacillales; Planococcaceae; Planomicrobium                        | 0.8476970  | 2.13e-05  | 30     |
| JN245782.1.1433 | Proteobacteria; <b>Alphaproteobacteria</b> .; Rhodobacterales; Rhodobacteraceae; Defluviimonas | 0.8356655  | 2.13e-05  | 29     |

The metabolic plasticity of Pseudomonadales and Burkholderiales orders has been demonstrated<sup>71–74</sup> and may be a catalyst for their apparent centrality across the terrestrial deep subsurface microbiomes analysed in this study. These bacterial orders may represent important keystone taxa in microbial consortia responsible for providing key substrates to other colonizers in deep subsurface environments<sup>75,76</sup>. In particular, given the number of highly central *Pseudomonas*-affiliated OTUs and the prevalence of this genus in the dataset, we suggest that this genus may be key in establishing conditions for microbial colonization in many terrestrial subsurface environments. Genus *Pseudomonas* and possibly several members of Burkholderiales may therefore comprise an important component of the global core terrestrial deep subsurface microbial community.

### ***Challenges from contamination***

16S rRNA gene PCR-based approaches for characterizing microbial diversity in low biomass environments benefit from the sensitivity afforded by PCR, at the cost of vulnerability to contamination<sup>77</sup>. Here, we used the prominence of sequences associated with phototrophic taxa as an indicator of either ingress of surface microbiota or contamination during sample processing. The discovery of potentially photosynthetic taxa in the initial dataset, namely 46 OTUs classified as Chloroplast (Cyanobacteria) was read as a sign that further bioinformatics-driven precautions should be taken, despite recent evidence of some cyanobacterial presence in some locations within the deep subsurface<sup>78,79</sup>. Specifically, the presence of other phototrophic members of phyla Chloroflexi and Chlorobi as well as classes Rhodospirillales (Alphaproteobacteria) and Chromatiales (Gammaproteobacteria) informed the decision to filter the dataset to hold only OTUs represented by more than 500 sequences and present in at least 10 samples. Recent recommendations for quality control of 16S rRNA gene datasets also support filtering-based approaches when applied to low biomass subsurface environments<sup>38</sup>. This constraint reduced the dataset to the 70 samples and 2,207 OTUs (513,929 sequences) used for the meta-analysis (**Table 1**), and also reduced the number of prospective contaminants by half, although only ~26% of the reads associated to Chloroplast-like sequences were removed (17 OTUs, 1958 reads).

Collecting contamination-free samples from the deep subsurface is difficult but important for cataloguing the authentic microbial diversity of the terrestrial subsurface. This study follows recent recommendations for downstream processing of contaminant-prone samples originated in the deep subsurface (Census of Deep Life project - <http://codl.coas.oregonstate.edu/>), where physical, chemical and biological, but also *in-silico* bioinformatics strategies to prevent erroneous conclusions have been highlighted<sup>38,80,81</sup>. This study also follows frequency-based OTU filtration techniques

similar to those recommended in Sheik *et al.* (2018)<sup>38</sup> and designed to remove possible contaminants introduced during sampling or during the various steps related to sample processing. The pre-emptive quality control steps hereby undertaken support a non-contaminant origin for taxa analysed in this dataset following careful in-field and laboratorial contamination-aware procedures carried out in each study. As such, the predominance of typically contaminant taxa affiliated *e.g.* to genus *Pseudomonas* was accepted as a true trend in the microbial ecology of the terrestrial deep subsurface.

No evidence was found for DNA extraction and PCR procedures significantly affecting microbial community structure in this meta-analysis (6.01% of the microbial community structure cumulatively [ADONIS/PERMANOVA, F-statistic=3.85, 3.23, p-value <0.01, adjusted Bonferroni correction p-value <0.001] vs. 50.6% from host rock lithology). In spite of this, a general convergence in DNA extraction methods would help further reduce methodology based variation and to standardize downstream analysis of deep subsurface microbial datasets<sup>82</sup>, despite the practical challenges of each host-rock matrix and local geochemical conditions.

In the near future, the advent of recently developed techniques for primer bias-free long read 16S rRNA and 16S rRNA-ITS gene amplicon long-read-based sequencing may initiate a convergence of molecular methods from which the deep subsurface microbiology community would benefit greatly<sup>83,84</sup>. The future of large-scale, collaborative deep subsurface microbial diversity studies should encompass not only an effort towards standardization of several molecular biology techniques but also the long-term archival of samples<sup>85</sup>. This will permit re-analyses using updated or unified methods after collection, where methodological variations would be controlled, and robust conclusions would more easily be achieved.

## Conclusions

A global scale meta-analysis addressing the available 16S rRNA gene-based studies of the deep terrestrial subsurface revealed the dominance of Betaproteobacteria, Gammaproteobacteria and Firmicutes across this biome. Further, aquifer lithology was identified as the main driver of deep subterranean microbial communities. Depth and location were not significant controls of microbial community structure at this scale. Finally, evidence for a core terrestrial deep subsurface microbiome population was recognised through the prevalence and centrality of genus *Pseudomonas* (Gammaproteobacteria) and several other genera affiliated to class Betaproteobacteria. The adaptable metabolic capabilities associated to the above-mentioned taxa may be critical for colonizing the deep subsurface and sustaining communities. The terrestrial deep subsurface is a hard-to-reach complex

ecosystem crucial to global biogeochemical cycles. This study attempts to consolidate a global-scale understanding of taxonomical trends underpinning terrestrial deep subsurface microbial ecology and geomicrobiology.

## Methodology

### Data acquisition

The Sequence Read Archive database of the National Center for Biotechnology Information (SRA-NCBI) was queried for 16S rRNA-based deep subsurface datasets (excluding marine and ice samples, as well as any human-impacted samples); available studies, were downloaded using the SRA Run Selector. Studies were selected considering the metadata and information on sequencing platform used – i.e., only samples derived from 454 pyrosequencing and Illumina sequencing were considered. Analysis of related literature resulted in the detection of other deposited studies previous search efforts in NCBI-SRA failed to detect. Further private contacts allowed access to unpublished data included in this study. The final list of NCBI accession numbers, totalling 222 samples, was downloaded using *fastq-dump* from the SRA toolkit (<https://www.ncbi.nlm.nih.gov/sra/docs/toolkitsoft/>).

As seen in **Table 1**, required metadata included host-rock lithology, general and specific geographical locations, depth of sampling, DNA extraction method, sequenced 16S rRNA gene region and sequencing method. Any samples for which the above-mentioned metadata could not be found were discarded and not considered for downstream analyses.

### Pre-processing of 16S rRNA gene datasets

A customised pipeline was created in *bash* language making use of *python* scripts developed for QIIME v1.9.1<sup>86</sup>, to facilitate bioinformatic analyses in this study (see [https://github.com/GeoMicroSoares/mads\\_scripts](https://github.com/GeoMicroSoares/mads_scripts) for scripts). Briefly, demultiplexed FASTQ files were processed to create an OTU table. Quality control steps involved trimming, quality-filtering and chimera checking by means of USEARCH 6.1<sup>87</sup>. Sequence data that passed quality control were then subjected to closed-reference (CR) OTU-picking on a per-study basis using UCLUST<sup>87</sup> and reverse strand matching against the SILVA v123 taxonomic references (<https://www.arb-silva.de/documentation/release-123/>). Closed-reference OTU picking excludes OTUs whose taxonomy has not been found in the 16S rRNA gene database used. Although this limits the recovery of prokaryotic diversity to the recorded in the database, cross-study comparisons of microbial communities generated by different 16S rRNA gene primers are made possible. This conservative



approach classified OTUs in each study individually to the common 16S rRNA gene reference database the merge of all classification outputs. A single BIOM (Biological Observation Matrix) file was generated using QIIME's *merge\_otu\_tables.py* script. The BIOM file was then filtered to exclude samples represented by less than 2 OTUs using *filter\_samples\_from\_otu\_table.py*, as well as OTUs represented by one sequence (singleton OTUs) by using *filter\_otus\_from\_otu\_table.py*. In an attempt to reduce the impacts of potential contaminant OTUs from the dataset, the post-singleton filtered dataset was further filtered to include only OTUs represented by at least 500 sequences and present in at least 10 samples overall using *filter\_otus\_from\_otu\_table.py*.

## Data analysis

All downstream analyses were conducted using the *phyloseq* (<https://github.com/joey711/phyloseq>) package within R, which allowed for simple handling of metadata and taxonomy and abundance data<sup>88–90</sup>. Merged and filtered BIOM files were imported into R using internal *phyloseq* functions, which allowed further filtering, transformation and plotting of the dataset (see [https://github.com/GeoMicroSoares/mads\\_scripts](https://github.com/GeoMicroSoares/mads_scripts) for scripts).

Briefly, following a general assessment of the number of reads across samples and OTUs, *tax\_glom* (*phyloseq*) allowed the agglomeration of the OTU table at phylum-level. For the metadata category-directed analyses, function *merge\_samples* (*phyloseq*) created averaged OTU tables, which permitted testing of hypotheses for whether geology or depth had significant impacts on microbial community structure and composition. Computation of a Jensen-Shannon divergence PCoA (Principal Coordinate Analysis) was achieved with *ordinate* (*phyloseq*) which makes use of metaMDS (*vegan*)<sup>91,92</sup>. All figures were plotted making use of the *ggplot2* R package (<https://github.com/tidyverse/ggplot2>), except for the UpsetR plot in **Figure 2**, which was plotted with package *UpsetR* (<https://github.com/hms-dbmi/UpSetR>).



# References

1. McMahon, S. & Parnell, J. Weighing the deep continental biosphere. *FEMS Microbiol. Ecol.* **87**, 113–120 (2014).
2. Bar-On, Y. M., Phillips, R., Milo, R. & Falkowski, P. G. The biomass distribution on Earth. *PNAS* (2018). doi:10.1073/pnas.1711842115
3. Thompson, L. R. *et al.* A communal catalogue reveals Earth’s multiscale microbial diversity. *Nature* **551**, 457–463 (2017).
4. Long, P. E., Williams, K. H., Hubbard, S. S. & Ban, J. F. Microbial Metagenomics Reveals Climate-Relevant Subsurface Biogeochemical Processes. *Trends Microbiol.* **24**, 1–11 (2016).
5. Anantharaman, K. *et al.* Thousands of microbial genomes shed light on interconnected biogeochemical processes in an aquifer system. *Nat. Commun.* **7**, 1–11 (2016).
6. Hug, L. A. *et al.* Critical biogeochemical functions in the subsurface are associated with bacteria from new phyla and little studied lineages. *Environ. Microbiol.* **18**, 159–173 (2016).
7. Jelen, B. I., Giovannelli, D. & Falkowski, P. G. The Role of Microbial Electron Transfer in the Coevolution of the Biosphere and Geosphere. 45–62 (2016). doi:10.1146/annurev-micro-102215-095521
8. Falkowski, P. G., Fenchel, T. & Delong, E. F. The Microbial Engines That Drive Earth ’ s Biogeochemical Cycles. *Science (80-. ).* **320**, 1034–1039 (2008).
9. McMahon, S. & Parnell, J. The Deep History of Earth’s Biomass. *J. Geol. Soc. London.* jgs2018-061 (2018). doi:10.1144/jgs2018-061
10. Magnabosco, C. *et al.* The biomass and biodiversity of the continental subsurface. *Nat. Geosci.* **1** (2018). doi:10.1038/s41561-018-0221-6
11. Flemming, H.-C. & Wuertz, S. Bacteria and archaea on Earth and their abundance in biofilms. *Nat. Rev. Microbiol.* **1** (2019). doi:10.1038/s41579-019-0158-9
12. Gihring, T. M. *et al.* The distribution of microbial taxa in the subsurface water of the kalahari shield, south africa. *Geomicrobiol. J.* **23**, 415–430 (2006).
13. Moser, D. P. *et al.* Desulfotomaculum spp. and Methanobacterium spp. Dominate 4-5 km Deep Fault. *Appl. Environ. Microbiol.* **71**, 8773–8783 (2005).
14. Miettinen, H. *et al.* Microbiome composition and geochemical characteristics of deep subsurface high-pressure environment, Pyhäsalmi mine Finland. *Front. Microbiol.* **6**, 1–16 (2015).
15. Bagnoud, A. *et al.* Reconstructing a hydrogen-driven microbial metabolic network in Opalinus Clay rock. *Nat. Commun.* **7**, 12770 (2016).
16. Dong, Y. *et al.* Halomonas sulfidaeris-dominated microbial community inhabits a 1.8 km-

- 417 deep subsurface Cambrian Sandstone reservoir. *Environ. Microbiol.* **16**, 1695–708 (2014).
- 418 17. Purkamo, L., Bomberg, M., Kietäväinen, R., Salavirta, H. & Nyysönen, M. Microbial co-  
419 occurrence patterns in deep Precambrian bedrock fracture fluids. *Biogeosciences* 3091–3108  
420 (2016). doi:10.5194/bg-13-3091-2016
- 421 18. Purkamo, L. *et al.* Diversity and functionality of archaeal, bacterial and fungal communities  
422 in deep Archaeal bedrock groundwater. *FEMS Microbiol. Ecol.* (2018).  
423 doi:10.1093/femsec/fiy116
- 424 19. Baker, B. J. *et al.* Related assemblages of sulphate-reducing bacteria associated with  
425 ultradeep gold mines of South Africa and deep basalt aquifers of Washington State. *Environ.*  
426 *Microbiol.* **5**, 267–277 (2003).
- 427 20. Chivian, D. *et al.* Environmental Genomics Reveals a Single-Species Ecosystem Deep  
428 Within Earth. *Science* (80-. ). **322**, 275–278 (2008).
- 429 21. Ueno, A., Shimizu, S., Tamamura, S., Okuyama, H. & Naganuma, T. Anaerobic  
430 decomposition of humic substances by *Clostridium* from the deep subsurface. *Nat. Publ. Gr.*  
431 1–9 (2016). doi:10.1038/srep18990
- 432 22. Sousa, D. Z. *et al.* The deep-subsurface sulfate reducer *Desulfotomaculum kuznetsovii*  
433 employs two methanol-degrading pathways. *Nat. Commun.* **9**, 239 (2018).
- 434 23. Brazelton, W. J., Morrill, P. L., Szponar, N. & Schrenk, M. O. Bacterial communities  
435 associated with subsurface geochemical processes in continental serpentinite springs. *Appl.*  
436 *Environ. Microbiol.* **79**, 3906–3916 (2013).
- 437 24. Vieira-Silva, S. *et al.* Species–function relationships shape ecological properties of the  
438 human gut microbiome. *Nat. Microbiol.* **1**, 16088 (2016).
- 439 25. Nuppenen-Puputti, M. *et al.* Rare Biosphere Archaea Assimilate Acetate in Precambrian  
440 Terrestrial Subsurface at 2.2 km Depth. *Geosciences* **8**, 418 (2018).
- 441 26. Hubalek, V. *et al.* Connectivity to the surface determines diversity patterns in subsurface  
442 aquifers of the Fennoscandian shield. *ISME J.* **10**, 2447–2458 (2016).
- 443 27. Emerson, J. B., Thomas, B. C., Alvarez, W. & Banfield, J. F. Metagenomic analysis of a high  
444 carbon dioxide subsurface microbial community populated by chemolithoautotrophs and  
445 bacteria and archaea from candidate phyla. *Environ. Microbiol.* n/a-n/a (2015).  
446 doi:10.1111/1462-2920.12817
- 447 28. Wouters, K., Moors, H., Boven, P. & Leys, N. Evidence and characteristics of a diverse and  
448 metabolically active microbial community in deep subsurface clay borehole water. *FEMS*  
449 *Microbiol. Ecol.* **86**, 458–473 (2013).
- 450 29. Ünal, B. *et al.* Trace elements affect methanogenic activity and diversity in enrichments from  
451 subsurface coal bed produced water. *Front. Microbiol.* **3**, 1–14 (2012).

- 452 30. Hernsdorf, A. W. *et al.* Potential for microbial H<sub>2</sub> and metal transformations associated with  
453 novel bacteria and archaea in deep terrestrial subsurface sediments. *ISME J.* **11**, 1915–1929  
454 (2017).
- 455 31. Lopez-Fernandez, M. *et al.* Investigation of viable taxa in the deep terrestrial biosphere  
456 suggests high rates of nutrient recycling. *FEMS Microbiol. Ecol.* **94**, (2018).
- 457 32. Lloyd, K. G., Ladau, J., Steen, A. D., Yin, J. & Crosby, L. Phylogenetically novel uncultured  
458 microbial cells dominate Earth microbiomes. *bioRxiv* 303602 (2018). doi:10.1101/303602
- 459 33. Lollar, B. S. *et al.* Unravelling abiogenic and biogenic sources of methane in the Earth's deep  
460 subsurface. *Chem. Geol.* **226**, 328–339 (2006).
- 461 34. Lin, L. *et al.* Long-Term Sustainability of a High-Energy, Low-Diversity Crustal Biome.  
462 *Science* (80-. ). **314**, (2006).
- 463 35. Li, L. *et al.* Sulfur mass-independent fractionation in subsurface fracture waters indicates a  
464 long-standing sulfur cycle in Precambrian rocks. *Nat. Commun.* **7**, 13252 (2016).
- 465 36. Lollar, G. S., Warr, O., Telling, J., Osburn, M. R. & Sherwood Lollar, B. “Follow the  
466 Water”: Hydrogeochemical Constraints on Microbial Investigations 2.4 km below surface at  
467 the Kidd Creek Deep Fluid and Deep Life Observatory. *Geomicrobiol. J.* **In review**, (2019).
- 468 37. Griffin, W. T., Phelps, T. J., Colwell, F. S. & Fredrickson, J. K. in *Microbiology of the*  
469 *Terrestrial Deep Subsurface* 23–44 (CRC Press, 2018). doi:10.1201/9781351074568-3
- 470 38. Sheik, C. S. *et al.* Identification and removal of contaminant sequences from ribosomal gene  
471 databases: Lessons from the Census of Deep Life. *Front. Microbiol.* **9**, 840 (2018).
- 472 39. Wilkins, M. J. *et al.* Trends and future challenges in sampling the deep terrestrial biosphere.  
473 *Front. Microbiol.* **5**, 1–8 (2014).
- 474 40. Brockman, F. J., Murray, C. J. & Murray, C. J. in *The Microbiology of the Terrestrial Deep*  
475 *Subsurface* 75–102 (CRC Press, 2018). doi:10.1201/9781351074568-6
- 476 41. Russell, B. F., Phelps, T. J., Griffin, W. T. & Sargent, K. A. Procedures for Sampling Deep  
477 Subsurface Microbial Communities in Unconsolidated Sediments. *Groundw. Monit.*  
478 *Remediat.* **12**, 96–104 (1992).
- 479 42. Andreou, L. V. in *Methods in Enzymology* **529**, 143–151 (John Wiley & Sons, Inc., 2013).
- 480 43. Osburn, M. R., LaRowe, D. E., Momper, L. M. & Amend, J. P. Chemolithotrophy in the  
481 continental deep subsurface: Sanford Underground Research Facility (SURF), USA. *Front.*  
482 *Microbiol.* **5**, 1–14 (2014).
- 483 44. Barnhart, E. P. *et al.* Hydrogeochemistry and coal-associated bacterial populations from a  
484 methanogenic coal bed. *Int. J. Coal Geol.* **162**, 14–26 (2016).
- 485 45. Foght, J. *et al.* Culturable Bacteria in Subglacial Sediments and Ice from Two Southern  
486 Hemisphere Glaciers. *Microb. Ecol.* **47**, 329–40 (2004).

- 487 46. Tillett, D. & Neilan, B. A. Xanthogenate nucleic acid isolation from cultured and  
488 environmental cyanobacteria. *J. Phycol.* **36**, 251–258 (2000).
- 489 47. Leuko, S. *et al.* Lysis efficiency of standard DNA extraction methods for *Halococcus* spp. in  
490 an organic rich environment. *Extremophiles* **12**, 301–308 (2008).
- 491 48. Frank, Y. A. *et al.* Stable and variable parts of microbial community in Siberian deep  
492 subsurface thermal aquifer system revealed in a long-term monitoring study. *Front.*  
493 *Microbiol.* **7**, 1–15 (2016).
- 494 49. Lawson, C. E. *et al.* Patterns of endemism and habitat selection in coalbed microbial  
495 communities. *Appl. Environ. Microbiol.* AEM.01737-15 (2015). doi:10.1128/AEM.01737-15
- 496 50. Bomberg, M., Lamminmäki, T. & Itävaara, M. Microbial communities and their predicted  
497 metabolic characteristics in deep fracture groundwaters of the crystalline bedrock at  
498 Olkiluoto, Finland. *Biogeosciences* **13**, 6031–6047 (2016).
- 499 51. Rajala, P. & Bomberg, M. Reactivation of Deep Subsurface Microbial Community in  
500 Response to Methane or Methanol Amendment. *Front. Microbiol.* **08**, 431 (2017).
- 501 52. Blanco, Y. *et al.* Deciphering the Prokaryotic Community and Metabolisms in South African  
502 Deep-Mine Biofilms through Antibody Microarrays and Graph Theory. *PLoS One* **9**,  
503 e114180 (2014).
- 504 53. Singh, P. K., Singh, A. L., Kumar, A. & Singh, M. P. Control of different pyrite forms on  
505 desulfurization of coal with bacteria. *Fuel* **106**, 876–879 (2013).
- 506 54. Machnikowska, H., Pawelec, K. & Podgórska, A. Microbial degradation of low rank coals.  
507 *Fuel Process. Technol.* **77–78**, 17–23 (2002).
- 508 55. Lepleux, C., Turpault, M. P., Oger, P., Frey-Klett, P. & Uroz, S. Correlation of the  
509 abundance of betaproteobacteria on mineral surfaces with mineral weathering in forest soils.  
510 *Appl. Environ. Microbiol.* **78**, 7114–9 (2012).
- 511 56. Gründger, F. *et al.* Microbial methane formation in deep aquifers of a coal-bearing  
512 sedimentary basin, Germany. *Front. Microbiol.* **6**, (2015).
- 513 57. Yagi, J. M., Sims, D., Brettin, T., Bruce, D. & Madsen, E. L. The genome of *Polaromonas*  
514 *naphthalenivorans* strain CJ2, isolated from coal tar-contaminated sediment, reveals  
515 physiological and metabolic versatility and evolution through extensive horizontal gene  
516 transfer. *Environ. Microbiol.* **11**, 2253–2270 (2009).
- 517 58. Kostka, J. E. *et al.* Hydrocarbon-degrading bacteria and the bacterial community response in  
518 gulf of Mexico beach sands impacted by the deepwater horizon oil spill. *Appl. Environ.*  
519 *Microbiol.* **77**, 7962–74 (2011).
- 520 59. Posman, K. M., DeRito, C. M. & Madsen, E. L. Benzene Degradation by a *Variovorax*  
521 *Species* within a Coal Tar-Contaminated Groundwater Microbial Community. *Appl. Environ.*

- 522        *Microbiol.* **83**, (2017).
- 523    60.    Dürre, P. in *Encyclopedia of Life Sciences* 1–11 (John Wiley & Sons, Ltd, 2015).
- 524        doi:10.1002/9780470015902.a0020370.pub2
- 525    61.    Jungbluth, S. P., Glavina del Rio, T., Tringe, S. G., Stepanauskas, R. & Rappé, M. S.
- 526        Genomic comparisons of a bacterial lineage that inhabits both marine and terrestrial deep
- 527        subsurface systems. *PeerJ* **5**, e3134 (2017).
- 528    62.    Lollar, B. S., Onstott, T. C., Lacrampe-Couloume, G. & Ballentine, C. J. The contribution of
- 529        the Precambrian continental lithosphere to global H<sub>2</sub> production. *Nature* **516**, 379–382
- 530        (2014).
- 531    63.    Aüllo, T., Ranchou-Peyruse, A., Ollivier, B. & Magot, M. Desulfotomaculum spp. and
- 532        related gram-positive sulfate-reducing bacteria in deep subsurface environments. *Front.*
- 533        *Microbiol.* **4**, 1–12 (2013).
- 534    64.    Stegen, J. C. *et al.* Coupling among Microbial Communities , Biogeochemistry , and
- 535        Mineralogy across Biogeochemical Facies. *Nat. Publ. Gr.* 1–14 (2016).
- 536        doi:10.1038/srep30553
- 537    65.    Schrenk, M. O., Brazelton, W. J. & Lang, S. Q. Serpentinization, Carbon, and Deep Life.
- 538        *Rev. Mineral. Geochemistry* **75**, 575–606 (2013).
- 539    66.    Fredrickson, J. K. & Balkwill, D. L. Geomicrobial Processes and Biodiversity in the Deep
- 540        Terrestrial Subsurface. *Geomicrobiol. J.* **23**, 345–356 (2006).
- 541    67.    Parnell, J. & McMahon, S. Physical and chemical controls on habitats for life in the deep
- 542        subsurface beneath continents and ice. *Philos. Trans. R. Soc. A* **374**, 20140293 (2016).
- 543    68.    Momper, L., Jungbluth, S. P., Lee, M. D. & Amend, J. P. Energy and carbon metabolisms in
- 544        a deep terrestrial subsurface fluid microbial community. *ISME J.* **11**, 2319–2333 (2017).
- 545    69.    Wu, X. *et al.* Microbial metagenomes from three aquifers in the Fennoscandian shield
- 546        terrestrial deep biosphere reveal metabolic partitioning among populations. *ISME J.* **10**,
- 547        1192–1203 (2016).
- 548    70.    Altschul, S. F., Gish, W., Miller, W., Myers, E. W. & Lipman, D. J. Basic local alignment
- 549        search tool. *J. Mol. Biol.* **215**, 403–410 (1990).
- 550    71.    Alhasawi, A., Costanzi, J., Auger, C., Appanna, N. D. & Appanna, V. D. Metabolic
- 551        reconfigurations aimed at the detoxification of a multi-metal stress in *Pseudomonas*
- 552        fluorescens: Implications for the bioremediation of metal pollutants. *J. Biotechnol.* **200**, 38–
- 553        43 (2015).
- 554    72.    Raiger Iustman, L. J. *et al.* Genome sequence analysis of *Pseudomonas extremaustralis*
- 555        provides new insights into environmental adaptability and extreme conditions resistance.
- 556        *Extremophiles* **19**, 207–220 (2015).



- 557 73. Uroz, S., Calvaruso, C., Turpault, M.-P. P. & Frey-Klett, P. Mineral weathering by bacteria:  
558 ecology, actors and mechanisms. *Trends Microbiol.* **17**, 378–387 (2009).
- 559 74. Rosenberg, E. in *The Prokaryotes: Alphaproteobacteria and Betaproteobacteria* 1–1012  
560 (2013). doi:10.1007/978-3-642-30197-1
- 561 75. Onstott, T. C. *et al.* Indigenous and contaminant microbes in ultradeep mines. *Environ.*  
562 *Microbiol.* **5**, 1168–1191 (2003).
- 563 76. Davidson, M. M. *et al.* Capture of Planktonic Microbial Diversity in Fractures by Long-Term  
564 Monitoring of Flowing Boreholes, Evander Basin, South Africa. *Geomicrobiol. J.* **28**, 275–  
565 300 (2011).
- 566 77. Salter, S. J. *et al.* Reagent and laboratory contamination can critically impact sequence-based  
567 microbiome analyses. *BMC Biol.* **12**, 87 (2014).
- 568 78. Puente-Sánchez, F. *et al.* Viable cyanobacteria in the deep continental subsurface. *PNAS*  
569 (2018). doi:10.1073/pnas.1808176115
- 570 79. Di Rienzi, S. C. *et al.* The human gut and groundwater harbor non-photosynthetic bacteria  
571 belonging to a new candidate phylum sibling to Cyanobacteria. *Elife* **2**, e01102 (2013).
- 572 80. Sogin, M. & Edwards, K. Deep Subsurface Microbiology and the Deep Carbon Observatory.  
573 in *DCO Deep Life Workshop* (2010).
- 574 81. Davis, N. M., Proctor, D., Holmes, S. P., Relman, D. A. & Callahan, B. J. Simple statistical  
575 identification and removal of contaminant sequences in marker-gene and metagenomics data.  
576 *bioRxiv* 221499 (2018). doi:10.1101/221499
- 577 82. Direito, S. O. L., Marees, A. & Röling, W. F. M. Sensitive life detection strategies for low-  
578 biomass environments: Optimizing extraction of nucleic acids adsorbing to terrestrial and  
579 Mars analogue minerals. *FEMS Microbiol. Ecol.* **81**, 111–123 (2012).
- 580 83. Karst, S. M. *et al.* Retrieval of a million high-quality, full-length microbial 16S and 18S  
581 rRNA gene sequences without primer bias. *Nat. Biotechnol.* **36**, 190–195 (2018).
- 582 84. Martijn, J. *et al.* Amplicon sequencing of the 16S-ITS-23S rRNA operon with long-read  
583 technology for improved phylogenetic classification of uncultured prokaryotes. *bioRxiv*  
584 234690 (2017). doi:10.1101/234690
- 585 85. Fierer, N. & Cary, C. Don't let microbial samples perish. *Nature* **512**, 253–253 (2014).
- 586 86. Caporaso, J. G. *et al.* QIIME allows analysis of high-throughput community sequencing data.  
587 *Nat. Methods* **7**, 335–336 (2010).
- 588 87. Edgar, R. C. Search and clustering orders of magnitude faster than BLAST. **26**, 2460–2461  
589 (2010).
- 590 88. McMurdie, P. J. & Holmes, S. Phyloseq: An R Package for Reproducible Interactive  
591 Analysis and Graphics of Microbiome Census Data. *PLoS One* **8**, e61217 (2013).

- 592 89. Wickham, H. & Chang, W. ggplot2: An Implementation of the Grammar of Graphics.  
593 (2015).
- 594 90. R Development Core Team. R: A language and environment for statistical computing.  
595 (2008).
- 596 91. Dixon, P. VEGAN, a package of R functions for community ecology. *J. Veg. Sci.* **14**, 927–  
597 930 (2003).
- 598 92. Fuglede, B. & Topsoe, F. Jensen-Shannon divergence and Hilbert space embedding. in  
599 *International Symposium on Information Theory, 2004. ISIT 2004. Proceedings.* 30–30  
600 (IEEE, 2004). doi:10.1109/ISIT.2004.1365067  
601

## 602 **Acknowledgements**

603 The work was funded by a National Research Network for Low Carbon Energy and Environment  
 604 (NRN-LCEE) grant to ACM and AE from the Welsh Government and the Higher Education Funding  
 605 Council for Wales (Geo-Carb-Cymru). Deep borehole samples from Nevada and California, USA  
 606 (e.g. Nevares Deep Well 2 and **BLM-1**) were obtained with help in the field from Alexandra  
 607 Wheatley, Jim Bruckner, Jenny fisher and Scott Hamilton-Brehm, and technical assistance and  
 608 funding from the US Department of Energy's Subsurface Biogeochemical Research Program, the  
 609 Hydrodynamic Group, LLC, the Nye County Nuclear Waste Repository Program Office (NWRPO),  
 610 the US National Park Service, and Inyo Country, CA. Samples from a mine in Northern Ontario  
 611 Canada were obtained with funding from the Natural Sciences and Engineering Research Council of  
 612 Canada and the assistance of Thomas Eckert, and Greg Slater of McMaster University. The Census  
 613 of Deep Life (CoDL) and Deep Carbon Observatory (DCO) projects are acknowledged for a range  
 614 of studies used in this analysis, as well as the sequencing team at the Marine Biological Laboratory  
 615 (MBL). Disclaimer: Any use of trade, firm, or product names is for descriptive purposes only and  
 616 does not imply endorsement by the U.S. Government.

617

## 618 **Author Contributions**

619 ARS developed the methodology, collated and analysed the data, and wrote the manuscript. AE and  
 620 AM conceived the study, supervised AS and helped write the manuscript. Other authors provided  
 621 data from field sites used in the global meta-analysis. All authors contributed, edited and approved  
 622 the final manuscript.

623

## 624 **Conflict of Interest**

625 We declare no conflict of interest.



# 1 **Supplementary Information – “A global perspective on** 2 **microbial diversity in the terrestrial deep subsurface”**

3

## 4 **Authors:**

5 Soares, A.<sup>1,2,3</sup>, Edwards, A.<sup>2,3\*</sup>, An, D.<sup>4</sup>, Bagnoud, A.<sup>5</sup>, Barnhart, E.<sup>6,7</sup>, Bomberg, M.<sup>8</sup>, Budwill, K.<sup>9</sup>,  
6 Caffrey, S.<sup>10</sup>, Fields, M.<sup>7</sup>, Gralnick., J.<sup>11</sup>, Kadnikov, V.<sup>12,13</sup>, Momper, L.<sup>14</sup>, Osburn, M.<sup>15</sup>, Mu,  
7 A.<sup>16,17,18,19</sup>, Moreau, J.W.<sup>16</sup>, Moser, D.<sup>20</sup>, Purkamo, L.<sup>8,21,22</sup>, Rassner, S. M.<sup>1,3</sup>, Sheik, C. S.<sup>23</sup>,  
8 Sherwood Lollar, B.<sup>24</sup>, Toner, B. M.<sup>25</sup>, Voordouw, G.<sup>4</sup>, Wouters, K.<sup>26</sup>, Mitchell, A. C.<sup>1,3\*</sup>

9

# Supplementary Text

## *Depth weakly controls microbial community structure*

Life at extreme depths is yet to be analysed at a deep genomic level, but microbial cells have been discovered at depths down to 3,6 km in the terrestrial crust <sup>1,2</sup>. Although cell numbers tend to decrease with depth in both crystalline and sedimentary rock in the continental crust, not much is known regarding large-scale taxonomic trends <sup>2</sup>. No significant correlations were found for the presence of the most abundant clades in the dataset and depth, being Actinobacteria the only major taxonomic group to have a positive, albeit weak, correlation to depth (Pearson's  $r = 0.42$ ,  $p < 0.01$ , **Figure S2**). Actinobacteria have already been detected at great depths in both the continental and oceanic crusts and some of its members have further been reported to hold ancestral genes for pyruvate oxidoreductase activity, which could potentially propel microbial growth at higher temperatures <sup>3,4</sup>. Proportions of Beta- and Gammaproteobacteria decreased with depth (Pearson's  $r = -0.29$ , Pearson's  $r = -0.093$ ), and no other major clades were shown to correlate. More data needs to be generated to better investigate which, if any, taxonomic groups prefer deeper terrestrial environments. Biochemical limitations to life such as racemization rates of organic acids with depth and temperature will surely select for adaptable taxa and possibly create a mostly depth-defined gradient of representation of adapted extremophilic clades <sup>5</sup>.

## *99% closed-reference OTU analysis*

A 99% similarity closed-reference OTU-picking strategy to further minimize potential contamination showed a ~10-fold decrease in the number of OTUs and read numbers (1,065 OTUs and 70,527 reads were left). Further, this reduced the number of retrieved samples to 93. Following the previously described filtering steps (hold only OTUs represented by more than 500 sequences and present in at least 10 samples), 335 OTUs (67,151 reads) associated to 14 samples were left. For this reduced dataset, 2 OTUs associated to Chloroplast were found, represented by 115 sequences in total. The very reduced number of samples, OTUs and total reads left in the dataset caused the 99% OTU approach to be discontinued.

## Supplementary Methodology

### *Phylogeny of Pseudomonas representative sequences*

Representative 16S rRNA gene sequences for *Pseudomonas* OTUs in the dataset were isolated by retrieving OTU IDs affiliated to this genus in the final dataset using the *subset\_taxa* function within *phyloseq*<sup>6</sup>. The SILVA 123 database was then queried against the list of OTU IDs and the results deposited in a FASTA file. Outgroup sequences of genus *Sphingomonas* (Proteobacteria, Alphaproteobacteria, Sphingomonadales, Sphingomonadaceae) were obtained directly from the SILVA database (<https://www.arb-silva.de/>) and added along with the retrieved *Pseudomonas* 16S rRNA gene sequences to a final FASTA file.

Using MEGA7<sup>7</sup>, an alignment was performed using the MUSCLE<sup>8</sup> algorithm and 8 iterations of the UPGMB (combines Neighbour-Joining<sup>9</sup> and UPGMA - Unweighted Pair Group Method with Arithmetic mean) clustering method. An optimal Neighbour-Joining<sup>9</sup> tree (*cf.* **Supplementary Figure 4**) was then created using 500 bootstrapped replicates and the Maximum Composite Likelihood (MCL)<sup>10</sup> method to calculate evolutionary distances.

# Supplementary Figures

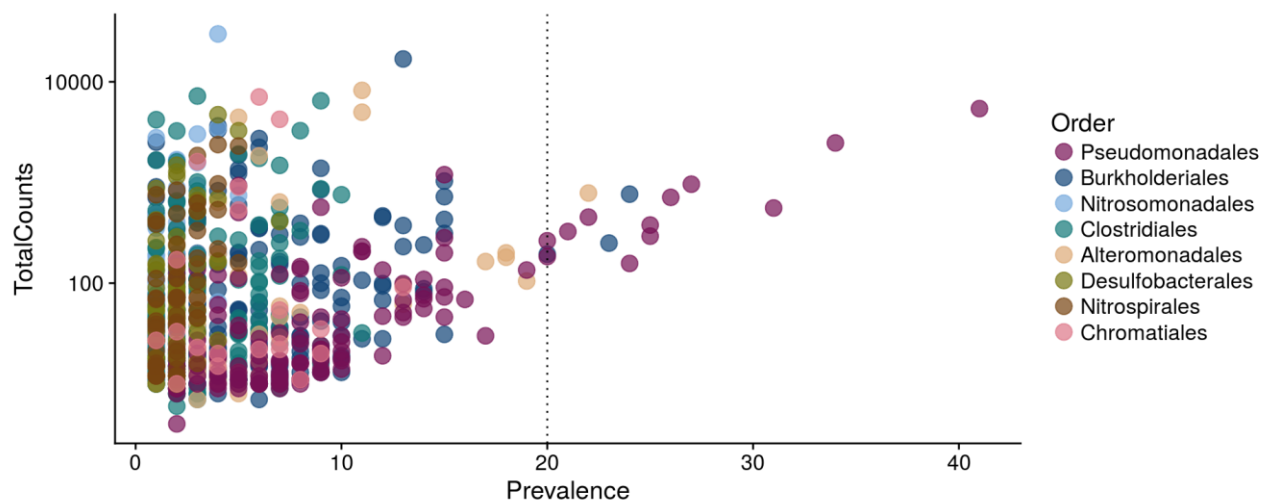

**Supplementary Figure 1** - Prevalence (number of samples an OTU is present in, x-axis) of OTUs across the dataset and associated reads (y-axis). Colours depict classification of OTUs at order level. Vertical line crosses 20 samples in the x-axis to highlight OTUs present in 20 or more samples.

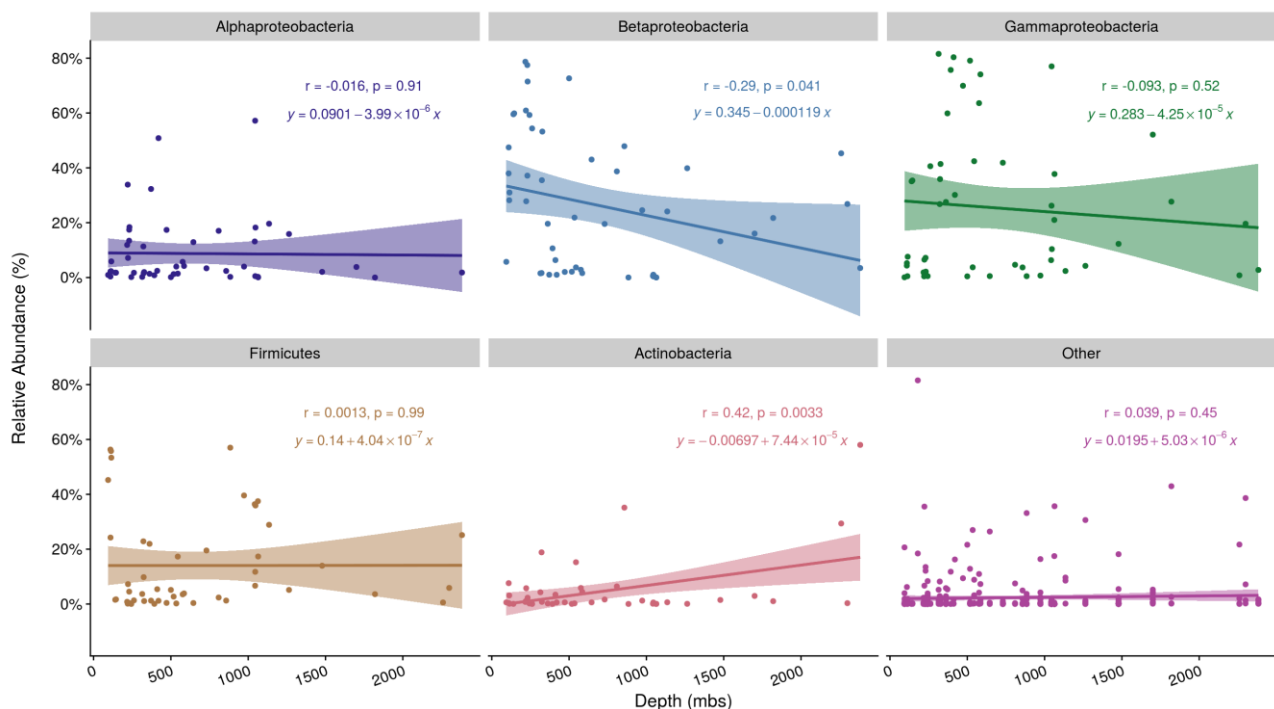

**Supplementary Figure 2** - Correlations between relative abundance of OTUs (% , y-axis) associated to the most abundant taxonomic groups across the dataset and depth (meters below surface, x-axis). Regression lines follow the linear model and shading around lines corresponds to the 95% confidence interval. Annotations in plot facets indicate the associated Pearson correlation coefficient, its corresponding p-value and the fitted linear model equation. Each point represents an OTU associated to the taxonomic group in each facet at a certain depth - a same OTU may be depicted more than one time.

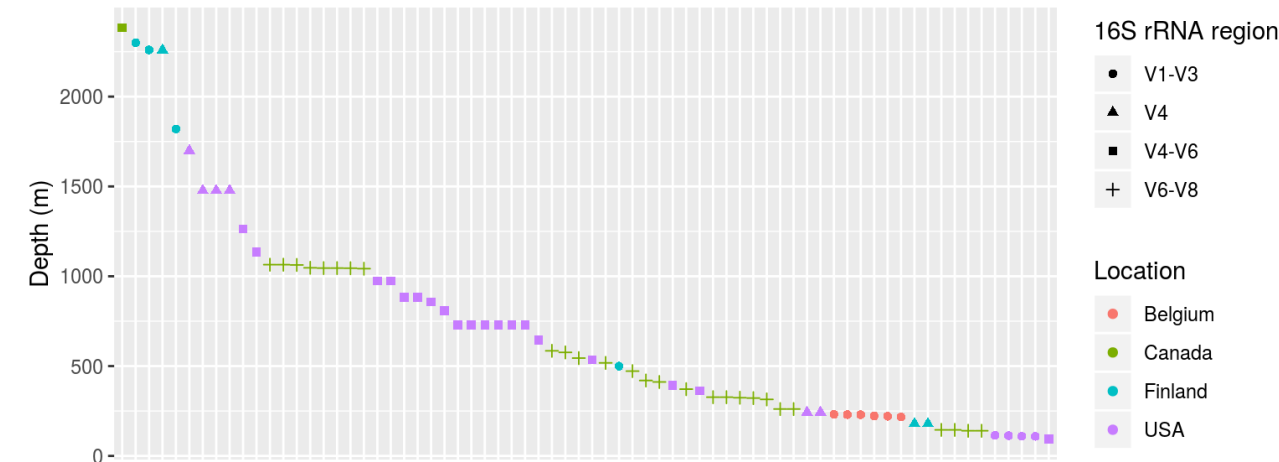

68  
69 **Supplementary Figure 3** – Distribution of samples in the final dataset across depth, coloured by  
70 general location. Shapes indicate 16S rRNA gene region utilised for that study.  
71

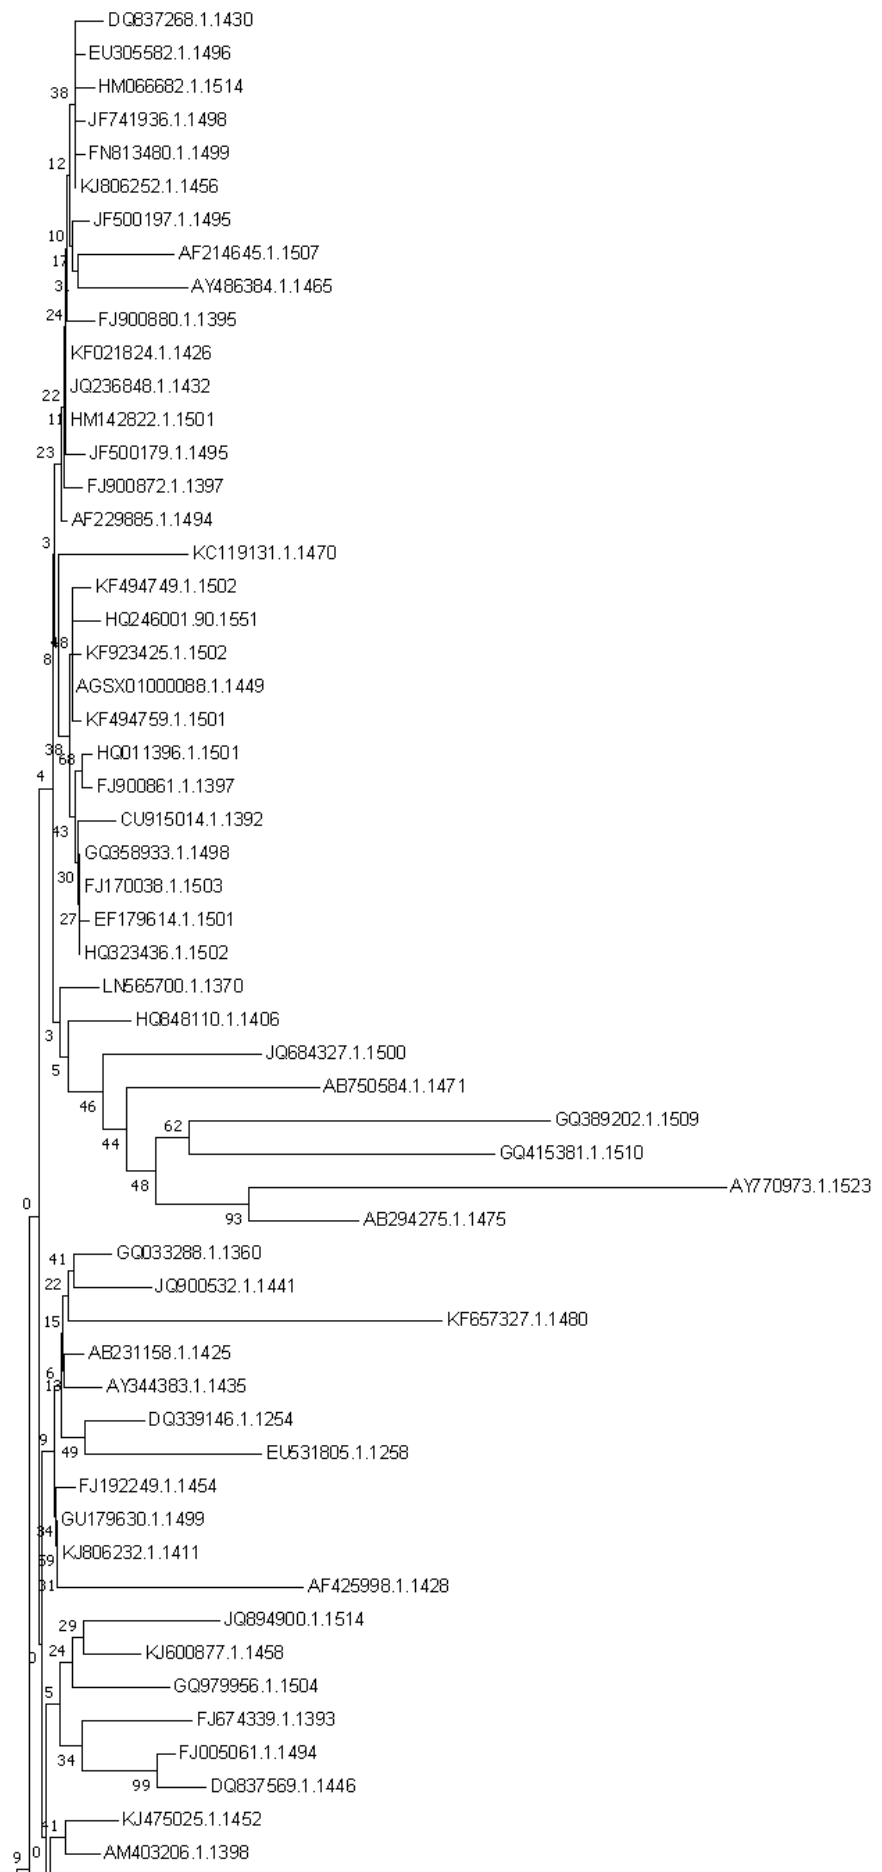

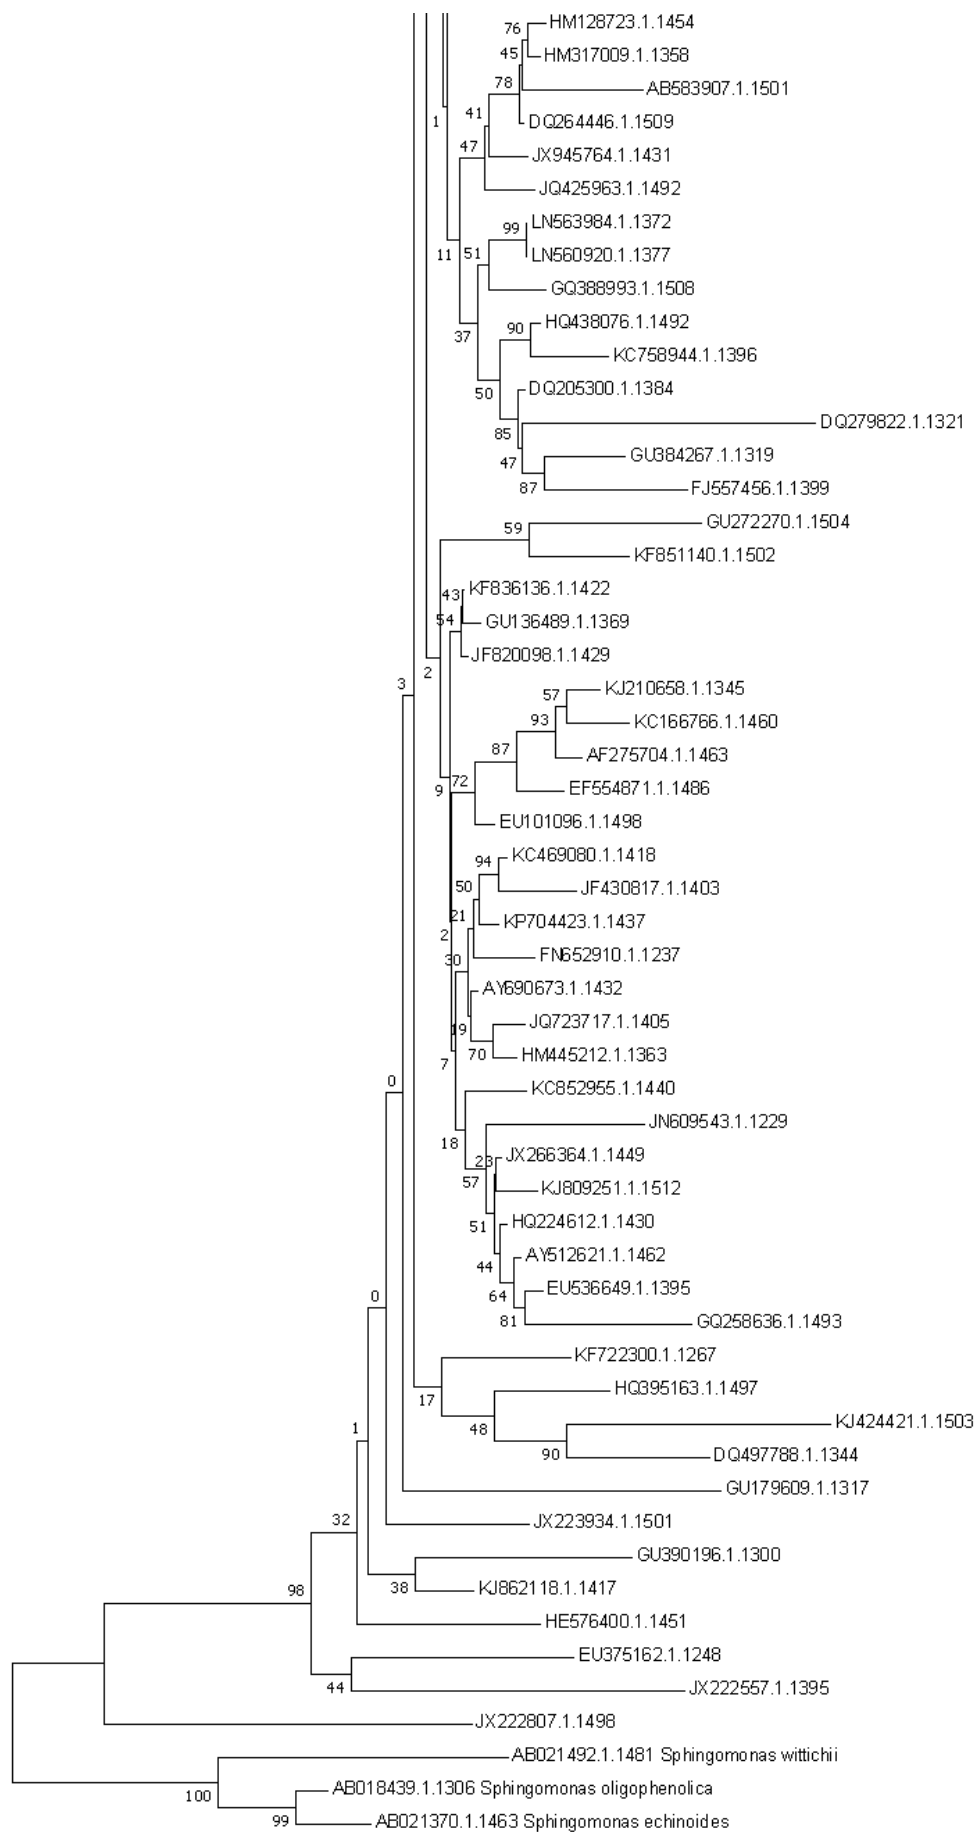

74 **Supplementary Figure 4** – Optimal Neighbor-Joining tree of representative sequences for  
 75 *Pseudomonas* OTUs in the dataset following MUSCLE alignment. OTU IDs are shown in the end of  
 76 each branch and outgroup sequences of genus *Sphingomonas* identified by their taxonomic affiliation.  
 77 The percentage of bootstrap test replicates are shown next to tree branches and scale for MCL  
 78 evolutionary distances is shown in the bottom.



# Supplementary Tables

**Supplementary Table 1** - Top 10 OTU network interactions ordered by edge betweenness (number of shortest paths going through an edge - OTU/OTU interactions) values as per the calculated Jaccard distances.

| OTU 1 Classification                                                           | OTU 2 Classification                                                          | Betweenness |
|--------------------------------------------------------------------------------|-------------------------------------------------------------------------------|-------------|
| Gammaproteobacteria, Chromatiales, Chromatiaceae, Rheinheimera                 | Gammaproteobacteria, Chromatiales, Chromatiaceae, Rheinheimera                | 1686        |
| Gammaproteobacteria, Chromatiales, Chromatiaceae, Rheinheimera                 | Gammaproteobacteria, Pseudomonadales, Moraxellaceae, Acinetobacter            | 1656.17     |
| Gammaproteobacteria, Chromatiales, Chromatiaceae, Rheinheimera                 | Gammaproteobacteria, Alteromonadales, Alteromonadaceae, Alishewanella         | 885.1       |
| Gammaproteobacteria, Pseudomonadales, Pseudomonadaceae, Pseudomonas            | Gammaproteobacteria, Chromatiales, Chromatiaceae, Rheinheimera                | 749         |
| Gammaproteobacteria, Pseudomonadales, Pseudomonadaceae, Pseudomonas            | Gammaproteobacteria, Chromatiales, Chromatiaceae, Rheinheimera                | 618         |
| Betaproteobacteria., Rhodocyclales, Rhodocyclaceae, Azoarcus                   | Betaproteobacteria, Rhodocyclales, Rhodocyclaceae, uncultured                 | 588         |
| Firmicutes, Clostridia, Clostridiales, Peptostreptococcaceae, Peptoclostridium | Firmicutes, Clostridia, Clostridiales, Peptostreptococcaceae, Intestinibacter | 588         |
| Gammaproteobacteria, Pseudomonadales, Pseudomonadaceae, Pseudomonas            | Alphaproteobacteria, Rhodobacterales, Rhodobacteraceae, Paracoccus            | 563.83      |
| Gammaproteobacteria, Chromatiales, Chromatiaceae, Rheinheimera                 | Gammaproteobacteria, Alteromonadales, Alteromonadaceae, Alishewanella         | 499.26      |
| Gammaproteobacteria, Pseudomonadales, Moraxellaceae, Acinetobacter             | Gammaproteobacteria, Pseudomonadales, Moraxellaceae, Acinetobacter            | 495         |

85 **Supplementary Table 2** - SILVA 123 taxonomic affiliations of OTUs present in 20 or more samples. Prevalence is defined as the number of samples  
86 an OTU is present in.

| Taxa ID         | Taxa Classification                                                                   | Prevalence |
|-----------------|---------------------------------------------------------------------------------------|------------|
| JQ236848.1.1432 | Proteobacteria, Gammaproteobacteria, Pseudomonadales, Pseudomonadaceae, Pseudomonas   | 41         |
| HM142822.1.1501 | Proteobacteria, Gammaproteobacteria, Pseudomonadales, Pseudomonadaceae, Pseudomonas   | 34         |
| JX266364.1.1449 | Proteobacteria, Gammaproteobacteria, Pseudomonadales, Pseudomonadaceae, Pseudomonas   | 31         |
| KJ475025.1.1452 | Proteobacteria, Gammaproteobacteria, Pseudomonadales, Pseudomonadaceae, Pseudomonas   | 27         |
| FJ192249.1.1454 | Proteobacteria, Gammaproteobacteria, Pseudomonadales, Pseudomonadaceae, Pseudomonas   | 26         |
| HQ848110.1.1406 | Proteobacteria, Gammaproteobacteria, Pseudomonadales, Pseudomonadaceae, Pseudomonas   | 25         |
| KC852955.1.1440 | Proteobacteria, Gammaproteobacteria, Pseudomonadales, Pseudomonadaceae, Pseudomonas   | 25         |
| HM773515.1.1498 | Proteobacteria, Betaproteobacteria, Burkholderiales, Comamonadaceae, uncultured       | 24         |
| AB231158.1.1425 | Proteobacteria, Gammaproteobacteria, Pseudomonadales, Pseudomonadaceae, Pseudomonas   | 24         |
| JX222276.1.1475 | Proteobacteria, Betaproteobacteria, Burkholderiales, Comamonadaceae, Variovorax       | 23         |
| EU841498.1.1443 | Proteobacteria; Gammaproteobacteria; Alteromonadales, Alteromonadaceae, Alishewanella | 22         |
| EU305582.1.1496 | Proteobacteria, Gammaproteobacteria, Pseudomonadales, Pseudomonadaceae, Pseudomonas   | 22         |
| FJ900880.1.1395 | Proteobacteria, Gammaproteobacteria, Pseudomonadales, Pseudomonadaceae, Pseudomonas   | 21         |

88 **Supplementary Table 3** – Metadata table with complete details for all studies utilized.

89

| SRA Accession | Depth gradient<br>(m) | DNA Extraction method                               | Sample Type      | 16S region  | Sequencing<br>method | Project |
|---------------|-----------------------|-----------------------------------------------------|------------------|-------------|----------------------|---------|
| PRJNA262938   | 243.84-1478.28        | Mod. Phenol chloroform                              | Groundwater      | V4          | 454                  |         |
| PRJNA268940   | 94-2383               | MoBio UltraClean Microbial DNA isolation kit        | Groundwater      | V4-V6       | 454                  | VAMPS   |
| PRJNA248749   | 730                   | MoBio PowerWater                                    | Groundwater      | V4-V6       | 454                  | VAMPS   |
| PRJNA251746   | 393-1135              | MoBio_PowerMax_Soil                                 | Groundwater      | V4-V6       | 454                  | VAMPS   |
| PRJNA375701   | 109-114.7             | Mod. MP-Biomedicals FastDNA Spin_Soil <sup>11</sup> | Rock + porewater | V1-V3       | 454                  |         |
| NA*           | 140-1064.4            | Foght <i>et al.</i> 2004                            | Rock + porewater | V6-V8       | 454                  | HMP     |
| PRJEB1468     | 217.13-231.83         | XS buffer <sup>13</sup>                             | Groundwater      | V1-V3       | 454                  |         |
| PRJEB10822    | 180-2300              | MoBio PowerSoil                                     | Groundwater      | V4**, V1-V3 | 454                  |         |

90 \* <http://hmp.ucalgary.ca/HMP/>

91 \* This primer pair corresponds to archaeal 16S rRNA gene primers (A344,A744, *cf.* 10.5194/bg-13-3091-2016 for further details).

92

**Supplementary Table 4** – BLAST hits table for representative sequences associated to OTUs affiliated to genus *Pseudomonas*.

| OTU ID              | Closest BLAST hit                                                                             | Associated NCBI Title                                                                                                                                                                                                      | Associated Environment | Taxonomy ID                  | NCBI Accession                     | Percent similarity (%) | E-value | No. Samples Associated | No. Reads Associated | Observations                                                               |
|---------------------|-----------------------------------------------------------------------------------------------|----------------------------------------------------------------------------------------------------------------------------------------------------------------------------------------------------------------------------|------------------------|------------------------------|------------------------------------|------------------------|---------|------------------------|----------------------|----------------------------------------------------------------------------|
| AB231158.1.1425     | <i>Pseudomonas pseudocaligenes</i> gene for 16S rRNA, partial sequence                        | High nitrogen removal from wastewater with several new aerobic bacteria isolated from diverse ecosystems                                                                                                                   | Wastewater             | 330                          | gi 85539942 dbj AB231158.1         | 100                    | 0       | 24                     | 157                  |                                                                            |
| AB294275.1.1475     | Uncultured bacterium gene for 16S rRNA, partial sequence, clone: YWB06                        | Molecular characterization of microbial communities in deep coal seam groundwater of northern Japan                                                                                                                        | Subsurface             | 77133                        | gi 126143387 dbj AB294275.1        | 100                    | 0       | 19                     | 135                  |                                                                            |
| AB583907.1.1501     | Uncultured bacterium gene for 16S rRNA, clone: RBC-4B                                         | Microbial community in water-rock-microbe interaction systems in subsurface environments                                                                                                                                   | Subsurface             | 77133                        | gi 324604950 dbj AB583907.1        | 100                    | 0       | 3                      | 137                  |                                                                            |
| AB750584.1.1471     | Uncultured bacterium gene for 16S rRNA, partial sequence, clone: 23 hydrate.Cas.16S           | Novel integrons and gene cassettes from a Cascadian submarine gas hydrate-bearing core                                                                                                                                     | Subsurface             | 77133                        | gi 407969505 dbj AB750584.1        | 100                    | 0       | 16                     | 69                   |                                                                            |
| AF214645.1.1507     | Nitrogen-fixing bacterium MIS 16S ribosomal RNA gene, partial sequence                        | Molecular characterization of plant associated nitrogen-fixing Bacteria                                                                                                                                                    | Subsurface             | 120486                       | gi 7542430 gb AF214645.1 AF214645  | 100                    | 0       | 4                      | 20                   |                                                                            |
| AF229885.1.1494     | <i>Pseudomonas</i> sp. 3CB6 16S ribosomal RNA gene, partial sequence                          | Isolation and characterization of diverse halobenzoate-degrading denitrifying bacteria from soils and sediments                                                                                                            | Subsurface             | 126132                       | gi 9965646 gb AF229885.1           | 100                    | 0       | 9                      | 22                   |                                                                            |
| AF275704.1.1463     | Unidentified Hailaer soda lake bacterium F5 16S ribosomal RNA gene, partial sequence          | China: Inner Mongolia                                                                                                                                                                                                      | Lake                   | 148462                       | gi 12275954 gb AF275704.1 AF275704 | 100                    | 0       | 12                     | 47                   |                                                                            |
| AF425998.1.1428     | Bacterium UNSW3 16S ribosomal RNA gene, partial sequence                                      | A survey of phylogeny and paralytic shellfish poison production from culturable bacteria associated with a toxic <i>Anabaena circinalis</i> strain                                                                         | Host-associated        | 190587                       | gi 23451685 gb AF425998.1          | 100                    | 0       | 14                     | 56                   |                                                                            |
| AGSX01000088.1.1449 | <i>Pseudomonas stutzeri</i> SDM-LAC contig000089, whole genome shotgun sequence               | Genome Sequence of <i>Pseudomonas stutzeri</i> SDM-LAC, a Typical Strain for Studying the Molecular Mechanism of Lactate Utilization                                                                                       | Lab strain             | 271420                       | gi 1093258265 emb LT629970.1       | 99.83                  | 0       | 6                      | 28                   |                                                                            |
| AM403206.1.1398     | <i>Pseudomonadaceae</i> bacterium D7-21 partial 16S rRNA gene, isolate D7-21                  | Diversity of Nitrate-reducing and Denitrifying Bacteria in a Marine Aquaculture Biofilter                                                                                                                                  | Seawater               | 404904                       | gi 115334066 emb AM403206.1        | 100                    | 0       | 8                      | 16                   |                                                                            |
| AY344383.1.1435     | Unidentified bacterium clone K2-4-3 16S ribosomal RNA gene, partial sequence                  | Microbial Communities in the Hawaiian Archipelago: A Microbial Diversity Hotspot                                                                                                                                           | Subsurface             | 1869227                      | gi 33391921 gb AY344383.1          | 100                    | 0       | 6                      | 10                   |                                                                            |
| AY486384.1.1465     | <i>Pseudomonas stutzeri</i> strain AU4823 16S ribosomal RNA gene, partial sequence            | PCR-based assay for differentiation of <i>Pseudomonas aeruginosa</i> from other <i>Pseudomonas</i> species recovered from cystic fibrosis patients                                                                         | Host-associated        | 316                          | gi 40019083 gb AY486384.1          | 100                    | 0       | 7                      | 17                   |                                                                            |
| AY512621.1.1462     | <i>Pseudomonas veronii</i> strain A1YdBTEx2-5 16S ribosomal RNA gene, partial sequence        | Alternative primer sets for PCR detection of genotypes involved in bacterial aerobic BTEX degradation: distribution of the genes in BTEX degrading isolates and in subsurface soils of a BTEX contaminated industrial site | Subsurface             | 76761                        | gi 41056888 gb AY512621.1          | 100                    | 0       | 15                     | 91                   |                                                                            |
| AY690673.1.1432     | Sulfitebacter sp. GC07 16S ribosomal RNA gene, partial sequence                               | The diversity of halotolerant heterotrophic bacteria isolated from rhizosphere soil of salt marshes from southwestern coasts in Korea                                                                                      | Subsurface             | 290364                       | gi 51243779 gb AY690673.1          | 100                    | 0       | 1                      | 33                   | Latest SILVA database classifies this sequence as genus <i>Pseudomonas</i> |
| AY770973.1.1523     | Uncultured bacterium clone W33 16S ribosomal RNA gene, partial sequence                       | Molecular analysis of the microbial communities of the oilfield marine sediment and soils                                                                                                                                  | Subsurface             | 77133                        | gi 54695050 gb AY770973.1          | 100                    | 0       | 10                     | 14                   |                                                                            |
| CU915014.1.1392     | <i>Pseudomonas stutzeri</i> partial 16S rRNA gene, strain                                     | Culturable microbial diversity and the impact of tourism in Kartchner Caverns, Arizona                                                                                                                                     | Subsurface             | 77133                        | gi 239913533 emb CU915014.1        | 100                    | 0       | 2                      | 13                   |                                                                            |
| DQ205300.1.1384     | <i>Pseudomonas</i> sp. HI-G1 16S ribosomal RNA gene, partial sequence                         | High-density universal 16S rRNA microarray analysis reveals broader diversity than typical clone library when sampling the environment                                                                                     | Subsurface             | 347772                       | gi 76365589 gb DQ205300.1          | 100                    | 0       | 2                      | 15                   |                                                                            |
| DQ264446.1.1509     | Uncultured bacterium clone BANW452 16S ribosomal RNA gene, partial sequence                   | Isolation of glyphosate-resistant bacterial species M9J918 from glyphosate-polluted wheat soil in China                                                                                                                    | Subsurface             | 77133                        | gi 82393910 gb DQ264446.1          | 100                    | 0       | 5                      | 13                   |                                                                            |
| DQ279822.1.1321     | <i>Pseudomonas</i> sp. D14 16S ribosomal RNA gene, partial sequence                           | Direct Submission, strain D14                                                                                                                                                                                              | Lab strain             | 358759                       | gi 82697883 gb DQ279822.1          | 100                    | 0       | 6                      | 10                   |                                                                            |
| DQ339146.1.1254     | <i>Pseudomonas</i> sp. M9J918 16S ribosomal RNA gene, partial sequence                        | Isolation of glyphosate-resistant bacterial species M9J918 from glyphosate-polluted wheat soil in China                                                                                                                    | Subsurface             | 366287                       | gi 85001608 gb DQ339146.1          | 100                    | 0       | 9                      | 13                   |                                                                            |
| DQ497788.1.1344     | <i>Pseudomonas</i> sp. SGB396 16S ribosomal RNA gene, partial sequence                        | Soil, subsurface, bacterial endophytes from <i>Taxus globosa</i>                                                                                                                                                           | Subsurface             | 77133                        | gi 98975506 gb DQ497788.1          | 100                    | 0       | 10                     | 44                   |                                                                            |
| DQ837268.1.1430     | <i>Pseudomonas stutzeri</i> strain WWvii23 16S ribosomal RNA gene, partial sequence           | wastewater in lagos and ogun states Nigeria                                                                                                                                                                                | Wastewater             | 86473                        | gi 112434217 gb DQ837268.1         | 100                    | 0       | 7                      | 16                   |                                                                            |
| DQ837569.1.1446     | <i>Pseudomonas</i> sp. K4 16S ribosomal RNA gene, partial sequence                            | Direct Submission, isolate K4                                                                                                                                                                                              | Lab strain             | 394945                       | gi 110704228 gb DQ837569.1         | 100                    | 0       | 9                      | 18                   |                                                                            |
| EF179614.1.1501     | <i>Pseudomonas</i> sp. WP02-4-9 16S ribosomal RNA gene, partial sequence                      | Isolation from deep-sea sediments                                                                                                                                                                                          | Subsurface             | 444156                       | gi 148251203 gb EF179614.1         | 100                    | 0       | 2                      | 4                    |                                                                            |
| EF554871.1.1486     | <i>Pseudomonas</i> sp. AB42 16S ribosomal RNA gene, partial sequence                          | Adaptative Potential of Alkaliphilic Bacteria towards Chloroaromatic Substrates Assessed by a gfp-Tagged 2,4-D Degradation Plasmid                                                                                         | Lake                   | 443000;443001;443002;1740285 | gi 146747229 gb EF554868.1         | 100                    | 0       | 9                      | 46                   |                                                                            |
| EU101096.1.1498     | Uncultured bacterium clone FS0612_B12 16S ribosomal RNA gene, partial sequence                | Niche differentiation among sulfur-oxidizing bacterial populations in cave waters                                                                                                                                          | Subsurface             | 77133                        | gi 156573149 gb EU101096.1         | 100                    | 0       | 5                      | 12                   |                                                                            |
| EU305582.1.1496     | Uncultured <i>Pseudomonas</i> sp. clone 3-A 16S ribosomal RNA gene, partial sequence          | Nitrite removal performance and community structure of nitrite oxidizing and heterotrophic bacteria suffered with organic Matter                                                                                           | Microcosm              | 114707                       | gi 163676410 gb EU305582.1         | 100                    | 0       | 22                     | 453                  |                                                                            |
| EU375162.1.1248     | Uncultured <i>Pseudomonas</i> sp. clone Sc13 16S ribosomal RNA gene, partial sequence         | Bacterial communities from shoreline environments (costa da morte, northwestern Spain) affected by the prestige oil spill                                                                                                  | Coastal water          | 114707                       | gi 166407785 gb EU375162.1         | 100                    | 0       | 2                      | 17                   |                                                                            |
| EU531805.1.1258     | <i>Pseudomonas pseudocaligenes</i> 16S ribosomal RNA gene, partial sequence                   | Bacterial strains isolated from harvested tiger shrimp ( <i>Penaeus Monodon</i> )                                                                                                                                          | Host-associated        | 330                          | gi 170962995 gb EU531805.1         | 100                    | 0       | 7                      | 12                   |                                                                            |
| EU536649.1.1395     | Uncultured bacterium clone nbt64e03 16S ribosomal RNA gene, partial sequence                  | A diversity profile of the human skin microbiota                                                                                                                                                                           | Host-associated        | 77133                        | gi 187964754 gb EU536649.1         | 100                    | 0       | 5                      | 503                  |                                                                            |
| FJ005061.1.1494     | <i>Pseudomonas</i> sp. enrichment culture clone Guo7 16S ribosomal RNA gene, partial sequence | The bioleaching feasibility for Pb/Zn smelting slag and community characteristics of indigenous moderate-thermophilic bacteria                                                                                             | Subsurface             | 557865                       | gi 204342383 gb FJ005061.1         | 100                    | 0       | 7                      | 17                   |                                                                            |
| FJ170038.1.1503     | <i>Pseudomonas</i> sp. CF14-10 16S ribosomal RNA gene, partial sequence                       | sediments of the South China Sea                                                                                                                                                                                           | Subsurface             | 562724                       | gi 206585088 gb FJ170038.1         | 100                    | 0       | 9                      | 568                  |                                                                            |
| FJ192249.1.1454     | Uncultured <i>Pseudomonas</i> sp. clone G13-S-5-G03 16S ribosomal RNA gene, partial sequence  | Comprehensive census of bacteria in clean rooms by using DNA microarray and cloning methods                                                                                                                                | Urban                  | 114707                       | gi 209421869 gb FJ192249.1         | 100                    | 0       | 26                     | 712                  |                                                                            |

**Supplementary Table 4** – BLAST hits table for representative sequences associated to OTUs affiliated to genus *Pseudomonas*.

|                  |                                                                                             |                                                                                                                                                                                    |                   |         |                             |       |   |    |      |  |
|------------------|---------------------------------------------------------------------------------------------|------------------------------------------------------------------------------------------------------------------------------------------------------------------------------------|-------------------|---------|-----------------------------|-------|---|----|------|--|
| FJ557456.1.1399  | Uncultured bacterium clone ET_H_1d10 16S ribosomal RNA gene, partial sequence               | Endotracheal tube biofilm inoculation of oral flora and subsequent colonization of opportunistic pathogens                                                                         | Host-associated   | 77133   | gi 224569195 gb FJ557456.1  | 100   | 0 | 6  | 11   |  |
| FJ674339.1.1393  | Uncultured bacterium clone LL141-1D15 16S ribosomal RNA gene, partial sequence              | Synecology of the primary and secondary feedlot habitats of <i>Escherichia coli</i> O157:H7                                                                                        | Biological sample | 77133   | gi 223678636 gb FJ674339.1  | 100   | 0 | 7  | 10   |  |
| FJ900861.1.1397  | Uncultured bacterium clone C-44 16S ribosomal RNA gene, partial sequence                    | Comparison of microbial community compositions of injection and production well samples in a long-term water-flooded petroleum Reservoir                                           | Subsurface        | 77133   | gi 229428754 gb FJ900861.1  | 100   | 0 | 7  | 9    |  |
| FJ900872.1.1397  | Uncultured bacterium clone C-55 16S ribosomal RNA gene, partial sequence                    | Comparison of microbial community compositions of injection and production well samples in a long-term water-flooded petroleum Reservoir                                           | Subsurface        | 77133   | gi 229428765 gb FJ900872.1  | 100   | 0 | 9  | 14   |  |
| FJ900880.1.1395  | Uncultured bacterium clone C-62 16S ribosomal RNA gene, partial sequence                    | Comparison of microbial community compositions of injection and production well samples in a long-term water-flooded petroleum Reservoir                                           | Subsurface        | 77133   | gi 229428773 gb FJ900880.1  | 100   | 0 | 21 | 326  |  |
| FN652910.1.1237  | <i>Pseudomonas putida</i> partial 16S rRNA gene, isolate P5                                 | Isolation, characterization and screening for antimicrobial activities of <i>Padina pavonica</i> associated bacteria                                                               | Host-associated   | 303     | gi 290490824 emb FN652910.1 | 100   | 0 | 3  | 45   |  |
| FN813480.1.1499  | <i>Pseudomonas stutzeri</i> partial 16S rRNA gene, isolate Gr20                             | The genetic diversity of culturable nitrogen-fixing bacteria in the rhizosphere of wheat                                                                                           | Subsurface        | 316     | gi 295810396 emb FN813480.1 | 100   | 0 | 17 | 30   |  |
| GQ033288.1.1360  | Uncultured bacterium clone nbw1028h09c1 16S ribosomal RNA gene, partial sequence            | Topographical and temporal diversity of the human skin microbiome                                                                                                                  | Host-associated   | 77133   | gi 238303670 gb GQ033288.1  | 100   | 0 | 4  | 10   |  |
| GQ258636.1.1493  | <i>Pseudomonas</i> sp. SR3(2009) 16S ribosomal RNA gene,                                    | Direct Submission, strain SR3                                                                                                                                                      | Lab strain        | 659426  | gi 256352433 gb GQ258636.1  | 100   | 0 | 5  | 933  |  |
| GQ358933.1.1498  | <i>Pseudomonas</i> sp. BSw21506 16S ribosomal RNA gene,                                     | Direct Submission, strain BSw21506                                                                                                                                                 | Lab strain        | 664427  | gi 255689465 gb GQ358933.1  | 100   | 0 | 12 | 19   |  |
| GQ388993.1.1508  | Uncultured bacterium clone J41 16S ribosomal RNA gene, partial sequence                     | Characterization of Bacterial Community Structure in a Drinking Water Distribution System during an Occurrence of Red Water                                                        | Subsurface        | 77133   | gi 256593919 gb GQ388993.1  | 100   | 0 | 5  | 11   |  |
| GQ389202.1.1509  | Uncultured bacterium clone D75 16S ribosomal RNA gene, partial sequence                     | Characterization of Bacterial Community Structure in a Drinking Water Distribution System during an Occurrence of Red Water                                                        | Subsurface        | 77133   | gi 256594128 gb GQ389202.1  | 100   | 0 | 8  | 16   |  |
| GQ415381.1.1510  | uncultured bacterium clone DQB-P183 genomic sequence                                        | Microbial diversity in different production waters of Daqing Oilfield                                                                                                              | Subsurface        | 77133   | gi 308097127 gb GQ415381.1  | 100   | 0 | 10 | 21   |  |
| GQ979956.1.1504  | Uncultured bacterium clone SRC_NRB027 16S ribosomal RNA gene, partial sequence              | Direct Submission, clone SRC_NRB027                                                                                                                                                | Lab strain        | 77133   | gi 261499583 gb GQ979956.1  | 100   | 0 | 15 | 283  |  |
| GU136489.1.1369  | <i>Pseudomonas</i> sp. DY1 16S ribosomal RNA gene, partial                                  | Direct Submission, strain DY1                                                                                                                                                      | Lab strain        | 690347  | gi 265263160 gb GU136489.1  | 100   | 0 | 7  | 13   |  |
| GU179609.1.1317  | Uncultured <i>Pseudomonas</i> sp. clone D006011A15 16S ribosomal RNA gene, partial sequence | Microbial diversity profiles of fluids from low-temperature petroleum reservoirs with and without exogenous water perturbation                                                     | Subsurface        | 114707  | gi 306491368 gb GU179609.1  | 100   | 0 | 2  | 159  |  |
| GU179630.1.1499  | Uncultured <i>Pseudomonas</i> sp. clone D118231H09 16S ribosomal RNA gene, partial sequence | Microbial diversity profiles of fluids from low-temperature petroleum reservoirs with and without exogenous water perturbation                                                     | Subsurface        | 114707  | gi 306491389 gb GU179630.1  | 100   | 0 | 9  | 17   |  |
| GU272270.1.1504  | <i>Pseudomonas amygdali</i> pv. <i>lachrymans</i> str. M301315 chromosome, complete genome  | Dynamic evolution of pathogenicity revealed by sequencing and comparative genomics of 19 <i>Pseudomonas syringae</i> isolates                                                      | Subsurface        | 77133   | gi 284025723 gb GU272270.1  | 100   | 0 | 3  | 648  |  |
| GU384267.1.1319  | <i>Pseudomonas aeruginosa</i> strain SZH16 16S ribosomal RNA gene, partial sequence         | In situ degradation of phenol and promotion of plant growth in contaminated environments by a single <i>Pseudomonas aeruginosa</i> strain                                          | Subsurface        | 287     | gi 288189621 gb GU384267.1  | 100   | 0 | 4  | 13   |  |
| GU390196.1.1300  | Uncultured bacterium clone SLE33F 16S ribosomal RNA gene, partial sequence                  | Shifts in microbial community structure of granular and liquid biomass in response to changes to infed and digester design in anaerobic digesters receiving food-processing wastes | Subsurface        | 77133   | gi 312178659 gb GU390196.1  | 100   | 0 | 14 | 70   |  |
| HE576400.1.1451  | uncultured bacterium partial 16S rRNA gene, clone K16.133 AW                                | A combined cultivation and cultivation-independent approach shows high bacterial diversity in water-miscible metalworking fluids                                                   | Urban             | 77133   | gi 377549755 emb HE576400.1 | 100   | 0 | 4  | 10   |  |
| HM066682.1.1514  | Uncultured bacterium clone EDW07B006_73 16S ribosomal RNA gene, partial sequence            | Microbial diversity and impact on carbonate geochemistry across a changing geochemical gradient in a karst aquifer                                                                 | Subsurface        | 77133   | gi 313770588 gb HM066682.1  | 100   | 0 | 8  | 16   |  |
| HM128723.1.1454  | Uncultured bacterium clone SINN704 16S ribosomal RNA gene, partial sequence                 | Diversity of bacterioplankton in contrasting Tibetan lakes revealed by high-density microarray and clone library analysis                                                          | Lake              | 77133   | gi 295879789 gb HM128723.1  | 100   | 0 | 20 | 184  |  |
| HM142822.1.1501  | Proteobacterium WJQ No.5 16S ribosomal RNA gene,                                            | Direct Submission, strain WJQ No. 5                                                                                                                                                | Lab strain        | 797062  | gi 298256144 gb HM142822.1  | 100   | 0 | 34 | 2472 |  |
| HM317009.1.1358  | Uncultured bacterium clone ncd315a03c1 16S ribosomal RNA gene, partial sequence             | Temporal shifts in the skin microbiome associated with disease flares and treatment in children with atopic dermatitis                                                             | Host-associated   | 77133   | gi 297010604 gb HM317009.1  | 100   | 0 | 4  | 12   |  |
| HM445212.1.1363  | Uncultured bacterium clone BL1289fO5 16S ribosomal RNA gene, partial sequence               | Comparison of Bacterial Diversity in Azorean and Hawaiian Lava Cave Microbial Mats                                                                                                 | Subsurface        | 77133   | gi 302398051 gb HM445212.1  | 100   | 0 | 7  | 32   |  |
| HQ011396.1.1501  | <i>Pseudomonas</i> sp. SGB387 16S ribosomal RNA gene, partial sequence                      | NCTC10475                                                                                                                                                                          | Lab strain        | 77133   | gi 307776705 gb HQ011396.1  | 100   | 0 | 8  | 139  |  |
| HQ224612.1.1430  | <i>Pseudomonas</i> sp. SGB387 16S ribosomal RNA gene, partial sequence                      | Phylogenetic relationships of bacterial endophytes from <i>Taxus globosa</i>                                                                                                       | Host-associated   | 1248114 | gi 411172546 gb JX897952.1  | 99.15 | 0 | 15 | 73   |  |
| HQ246001.90.1551 | UNVERIFIED: Uncultured <i>Pseudomonas</i> sp. 16S ribosomal RNA-like sequence               | Proteobacteria dominance in the estuarine belt of river Narmada, India as depicted by molecular phylogenetic approaches                                                            | Freshwater        | 471     | gi 226430883 gb FJ816052.1  | 88.52 | 0 | 4  | 19   |  |
| HQ323436.1.1502  | <i>Pseudomonas stutzeri</i> strain M4 16S ribosomal RNA gene, partial sequence              | Diversity of airborne bacteria community in the Mogao Grottoes, Dunhuang, China                                                                                                    | Air               | 316     | gi 319658795 gb HQ323436.1  | 100   | 0 | 6  | 10   |  |

**Supplementary Table 4** – BLAST hits table for representative sequences associated to OTUs affiliated to genus *Pseudomonas*.

|                 |                                                                                                 |                                                                                                                                                                      |                 |         |                            |     |   |    |      |  |
|-----------------|-------------------------------------------------------------------------------------------------|----------------------------------------------------------------------------------------------------------------------------------------------------------------------|-----------------|---------|----------------------------|-----|---|----|------|--|
| HQ395163.1.1497 | Uncultured bacterium clone OTU51 16S ribosomal RNA gene, partial sequence                       | Culture-independent and culture-dependent methods reveal diverse bacterial and archaeal communities in a biodegraded Malaysian oil Reservoir                         | Subsurface      | 77133   | gi 320172034 gb HQ395163.1 | 100 | 0 | 4  | 18   |  |
| HQ438076.1.1492 | <i>Pseudomonas</i> sp. TeU 16S ribosomal RNA gene, partial sequence                             | Isolation and characterization of an environmental cadmium- and tellurite-resistant <i>Pseudomonas</i> strain                                                        | Subsurface      | 944290  | gi 318063761 gb HQ438076.1 | 100 | 0 | 8  | 11   |  |
| HQ848110.1.1406 | <i>Pseudomonas argentinensis</i> strain PL-40-1 16S ribosomal RNA gene, partial sequence        | Phylogenetic diversity of culturable bacteria isolated from the disused ancient Kiyik River                                                                          | Freshwater      | 289370  | gi 340025389 gb HQ848110.1 | 100 | 0 | 25 | 378  |  |
| JF430817.1.1403 | <i>Pseudomonas</i> sp. P56(2011) 16S ribosomal RNA gene, partial sequence                       | Genetic and functional diversity of fluorescent <i>Pseudomonas</i> from rhizospheric soils of wheat crop                                                             | Subsurface      | 1079824 | gi 345132366 gb JF430817.1 | 100 | 0 | 14 | 76   |  |
| JF500179.1.1495 | Uncultured bacterium clone 1572_50bact 16S ribosomal RNA gene, partial sequence                 | The deep biosphere in terrestrial sediments in the chesapeake bay area, virginia, USA                                                                                | Subsurface      | 77133   | gi 343170179 gb JF500179.1 | 100 | 0 | 11 | 230  |  |
| JF500197.1.1495 | Uncultured bacterium clone 1563_48bact 16S ribosomal RNA gene, partial sequence                 | The deep biosphere in terrestrial sediments in the chesapeake bay area, virginia, USA                                                                                | Subsurface      | 77133   | gi 343170197 gb JF500197.1 | 100 | 0 | 10 | 18   |  |
| JF741936.1.1498 | Uncultured bacterium clone LHJB-8 16S ribosomal RNA gene, partial sequence                      | Microbial communities in oil reservoirs with different salinities                                                                                                    | Subsurface      | 77133   | gi 332712701 gb JF741936.1 | 100 | 0 | 3  | 10   |  |
| JF820098.1.1429 | <i>Pseudomonas</i> sp. PG-3-1 16S ribosomal RNA gene, partial sequence                          | Diversity of Culturable Butane-oxidizing Bacteria in Oil and Gas Field Soil                                                                                          | Subsurface      | 1036156 | gi 334690415 gb JF820098.1 | 100 | 0 | 8  | 11   |  |
| JN609543.1.1229 | <i>Pseudomonas fluorescens</i> strain Cantas14 16S ribosomal RNA gene, partial sequence         | The culturable intestinal microbiota of triploid and diploid juvenile Atlantic salmon ( <i>Salmo salar</i> ) - a comparison of composition and drug resistance       | Host-associated | 294     | gi 358440878 gb JN609543.1 | 100 | 0 | 5  | 38   |  |
| JQ236848.1.1432 | <i>Pseudomonas stutzeri</i> strain hswx82 16S ribosomal RNA gene, partial sequence              | Direct Submission, strain hswx82                                                                                                                                     | Lab strain      | 316     | gi 377830169 gb JQ236848.1 | 100 | 0 | 41 | 5419 |  |
| JQ425963.1.1492 | Uncultured bacterium clone CTC1CA03 16S ribosomal RNA gene, partial sequence                    | Bacterial diversity in an alkaline saline soil spiked with Anthracene                                                                                                | Lake            | 77133   | gi 385760667 gb JQ425953.1 | 100 | 0 | 9  | 22   |  |
| JQ684327.1.1500 | Uncultured bacterium clone HWGB-69 16S ribosomal RNA gene, partial sequence                     | Bacterial and archaeal diversity in permafrost soil from Kunlun Mountains Pass, Tibet Plateau of China                                                               | Subsurface      | 77133   | gi 387568220 gb JQ684327.1 | 100 | 0 | 3  | 12   |  |
| JQ723717.1.1405 | <i>Pseudomonas</i> sp. B-5-1 16S ribosomal RNA gene, partial sequence                           | beach sand in the west sea, Korea                                                                                                                                    | Coastal water   | 1172620 | gi 384392471 gb JQ723717.1 | 100 | 0 | 13 | 68   |  |
| JQ894900.1.1514 | Uncultured bacterium clone YPMB-G12 16S ribosomal RNA gene, partial sequence                    | Microbial diversity of endosymbiont bacteria in the spiraling Whitefly                                                                                               | Host-associated | 77133   | gi 411181008 gb JQ894900.1 | 100 | 0 | 9  | 21   |  |
| JQ900532.1.1441 | <i>Pseudomonas mendocina</i> strain B8 16S ribosomal RNA gene, partial sequence                 | Crude oil degrading bacterial isolates from ecological region of Assam                                                                                               | Subsurface      | 300     | gi 402244732 gb JQ900532.1 | 100 | 0 | 2  | 126  |  |
| JX222557.1.1395 | Uncultured bacterium clone EMIRGE_OTU_s2b2b_12537 16S ribosomal RNA gene, partial sequence      | Subsurface microbial community response to acetate amendment                                                                                                         | Subsurface      | 77133   | gi 395559126 gb JX222557.1 | 100 | 0 | 1  | 12   |  |
| JX222807.1.1498 | Uncultured bacterium clone EMIRGE_OTU_s3c2d_3949 16S ribosomal RNA gene, partial sequence       | Subsurface microbial community response to acetate amendment                                                                                                         | Subsurface      | 77133   | gi 395559376 gb JX222807.1 | 100 | 0 | 4  | 9    |  |
| JX223934.1.1501 | Uncultured bacterium clone EMIRGE_OTU_s6b4a_3133 16S ribosomal RNA gene, partial sequence       | Subsurface microbial community response to acetate amendment                                                                                                         | Subsurface      | 77133   | gi 395560503 gb JX223934.1 | 100 | 0 | 5  | 10   |  |
| JX266364.1.1449 | <i>Pseudomonas</i> sp. B2085 16S ribosomal RNA gene, partial sequence                           | Depth-Related Changes in Community Structure of Culturable Mineral Weathering Bacteria and in Weathering Patterns Caused by Them along Two Contrasting Soil Profiles | Subsurface      | 1225045 | gi 402549839 gb JX266364.1 | 100 | 0 | 31 | 558  |  |
| JX945764.1.1431 | <i>Pseudomonas</i> sp. LARP66 16S ribosomal RNA gene, partial sequence                          | Microbial diversity of Ethiopian soda lakes assessed by cultivation Methods                                                                                          | Lake            | 1266816 | gi 428274238 gb JX945764.1 | 100 | 0 | 8  | 11   |  |
| KC119131.1.1470 | <i>Pseudomonas</i> sp. RCC12 16S ribosomal RNA gene, partial sequence                           | Isolation of CO2 fixing bacteria from dehradun caves                                                                                                                 | Subsurface      | 1268824 | gi 429841843 gb KC119131.1 | 100 | 0 | 2  | 9    |  |
| KC166766.1.1460 | Uncultured <i>Pseudomonas</i> sp. clone BC061 16S ribosomal RNA gene, partial sequence          | Bacterial community and groundwater quality changes in an anaerobic aquifer during groundwater recharge with aerobic recycled water                                  | Subsurface      | 114707  | gi 523453881 gb KC166766.1 | 100 | 0 | 5  | 15   |  |
| KC469080.1.1418 | <i>Pseudomonas</i> sp. EM174 16S ribosomal RNA gene, partial sequence                           | Direct Submission, isolate EM174                                                                                                                                     | Lab strain      | 1282313 | gi 452108584 gb KC469080.1 | 100 | 0 | 6  | 19   |  |
| KC758944.1.1396 | Uncultured bacterium clone 12ALLV2e09 16S ribosomal RNA gene, partial sequence                  | Using DNA-stable isotope probing to identify microorganisms involved in mtbe and the biodegradation                                                                  | Coastal water   | 77133   | gi 478444906 gb KC758944.1 | 100 | 0 | 2  | 22   |  |
| KC852955.1.1440 | <i>Pseudomonas cuatrocieneegasensis</i> strain LEH6_4A 16S ribosomal RNA gene, partial sequence | Midgut Microbial Community of <i>Culex quinquefasciatus</i> Mosquito Populations from India                                                                          | Host-associated | 77133   | gi 523453428 gb KC852955.1 | 100 | 0 | 25 | 293  |  |
| KF021824.1.1426 | <i>Pseudomonas</i> sp. H-144 16S ribosomal RNA gene, partial sequence                           | Cultured diversity of marine bacteria                                                                                                                                | Seawater        | 1345863 | gi 513045820 gb KF021824.1 | 100 | 0 | 2  | 9    |  |
| KF494749.1.1502 | Uncultured bacterium clone B24-205 16S ribosomal RNA gene, partial sequence                     | Vertical changes of the structure of bacterial communities through a permafrost core profile from Qinghai-Tibet Plateau                                              | Subsurface      | 77133   | gi 532529728 gb KF494749.1 | 100 | 0 | 2  | 8    |  |
| KF494759.1.1501 | Uncultured bacterium clone B9-456 16S ribosomal RNA gene, partial sequence                      | Vertical changes of the structure of bacterial communities through a permafrost core profile from Qinghai-Tibet Plateau                                              | Subsurface      | 77133   | gi 532529738 gb KF494759.1 | 100 | 0 | 5  | 11   |  |
| KF657327.1.1480 | <i>Pseudomonas mendocina</i> strain 2E 16S ribosomal RNA gene, partial sequence                 | Alkalo Tolerant Bacteria, water                                                                                                                                      | Lake            | 300     | gi 545599206 gb KF657327.1 | 100 | 0 | 6  | 10   |  |
| KF722300.1.1267 | Uncultured <i>Pseudomonas</i> sp. clone DVBSW_J342 16S ribosomal RNA gene, partial sequence     | Response of bacterial community structure to seasonal fluctuation and anthropogenic pollution on coastal water of Alang-Sosiya ship breaking yard, Bhavnagar, India  | Coastal water   | 114707  | gi 643039831 gb KF722300.1 | 100 | 0 | 5  | 9    |  |
| KF836136.1.1422 | <i>Pseudomonas plecoglossicida</i> strain SBADK2 16S ribosomal RNA gene, partial sequence       | rhizosphere bacteria for agricultural and environmental use                                                                                                          | Subsurface      | 70775   | gi 578003379 gb KF836136.1 | 100 | 0 | 15 | 46   |  |
| KF851140.1.1502 | Uncultured <i>Pseudomonas</i> sp. clone BJP8S20-c24 16S ribosomal RNA gene, partial sequence    | Lithology-Controlled Bacteria Community in an Ammonium-Rich Aquifer-Aquitarad System in the Pearl River Delta, China                                                 | Subsurface      | 114707  | gi 582054428 gb KF851140.1 | 100 | 0 | 10 | 30   |  |
| KF923425.1.1502 | <i>Pseudomonas xanthomarina</i> strain 15 16S ribosomal RNA gene, partial sequence              | Culturable bacteria from the Qinghai-Tibet Plateau                                                                                                                   | Soil            | 271420  | gi 594591039 gb KF923425.1 | 100 | 0 | 8  | 10   |  |
| KJ210658.1.1345 | <i>Pseudomonas xinjiangensis</i> strain WL-257 16S ribosomal RNA gene, partial sequence         | Phylogenetic diversity of eudiphytic bacteria from <i>Populus euphratica</i> in 20-year <i>Populus jube</i> forest ecotone of Chakhikh county of Xinjiang            | Subsurface      | 487184  | gi 612340510 gb KJ210658.1 | 100 | 0 | 8  | 25   |  |
| KJ424421.1.1503 | <i>Pseudomonas</i> sp. GW28-5 16S ribosomal RNA gene, partial sequence                          | cytotoxic bacteria from Antarctica                                                                                                                                   | Host-associated | 77133   | gi 601035987 gb KJ424421.1 | 100 | 0 | 4  | 121  |  |

**Supplementary Table 4** – BLAST hits table for representative sequences associated to OTUs affiliated to genus *Pseudomonas*.

|                 |                                                                                       |                                                                                                                                                                                 |                 |              |                             |     |   |    |     |  |
|-----------------|---------------------------------------------------------------------------------------|---------------------------------------------------------------------------------------------------------------------------------------------------------------------------------|-----------------|--------------|-----------------------------|-----|---|----|-----|--|
| KJ475025.1.1452 | <i>Pseudomonas</i> peli strain IARI-RP26 16S ribosomal RNA gene, partial sequence     | Prospecting cold deserts of north western Himalayas for microbial diversity and plant growth promoting attributes                                                               | Soil            | 53406;592361 | gi 387285851 gb JQ795777.1  | 100 | 0 | 27 | 962 |  |
| KJ600877.1.1458 | Uncultured bacterium clone 83A 16S ribosomal RNA gene, partial sequence               | Manipulating the banana rhizosphere microbiome for biological control of Panama disease                                                                                         | Subsurface      | 77133        | gi 646117505 gb KJ600877.1  | 100 | 0 | 9  | 24  |  |
| KJ806232.1.1411 | <i>Pseudomonas</i> alcaligenes strain PBR-49 16S ribosomal RNA gene, partial sequence | Phylogenetic characterization of heterotrophic bacteria isolated from photobioreactor (PBR) cultures of <i>Synechocystis</i> sp. PCC6803                                        | Host-associated | 43263        | gi 669340641 gb KJ806232.1  | 100 | 0 | 10 | 26  |  |
| KJ806252.1.1456 | <i>Pseudomonas</i> stutzeri strain PBR-57 16S ribosomal RNA gene, partial sequence    | Phylogenetic characterization of heterotrophic bacteria isolated from photobioreactor (PBR) cultures of <i>Synechocystis</i> sp. PCC6803                                        | Host-associated | 316          | gi 669340661 gb KJ806252.1  | 100 | 0 | 7  | 10  |  |
| KJ809251.1.1512 | Uncultured bacterium clone F33GN 16S ribosomal RNA gene, partial sequence             | Bacteria associated with arbuscular mycorrhizal fungi within roots of plants growing in a soil highly contaminated with aliphatic and aromatic petroleum hydrocarbons           | Subsurface      | 77133        | gi 671777739 gb KJ809251.1  | 100 | 0 | 2  | 40  |  |
| KJ862118.1.1417 | Uncultured <i>Pseudomonas</i> sp. clone 35 16S ribosomal RNA gene, partial sequence   | 16S rDNA gene clone libraries which isolated from biodesulfurization bioreactor                                                                                                 | Microcosm       | 114707       | gi 672443372 gb KJ862118.1  | 100 | 0 | 8  | 79  |  |
| KP704423.1.1437 | <i>Pseudomonas</i> sp. UYFA113 16S ribosomal RNA gene, partial sequence               | Identification and characterization of the part of the bacterial community associated with field-grown tall fescue ( <i>Festuca arundinacea</i> ) cv. SFRO Don Tom s in Uruguay | Subsurface      | 1605337      | gi 756058359 gb KP704423.1  | 100 | 0 | 7  | 11  |  |
| LN560920.1.1377 | Uncultured bacterium partial 16S rRNA gene, clone SIGCS87_N11D1_16S_B                 | Leaf-cutter ant refuse dumps are nutrient reservoirs harboring diverse microbial assemblages                                                                                    | Microcosm       | 77133        | gi 697256444 emb LN563985.1 | 100 | 0 | 15 | 200 |  |
| LN563984.1.1372 | Uncultured bacterium partial 16S rRNA gene, clone SIBS643_N12D0_16S_B                 | Leaf-cutter ant refuse dumps are nutrient reservoirs harboring diverse microbial assemblages                                                                                    | Microcosm       | 77133        | gi 697256444 emb LN563985.1 | 100 | 0 | 6  | 16  |  |
| LN565700.1.1370 | Uncultured bacterium partial 16S rRNA gene, clone SIBG551_N12D2_16S_B                 | Leaf-cutter ant refuse dumps are nutrient reservoirs harboring diverse microbial assemblages                                                                                    | Microcosm       | 77133        | gi 697264995 emb LN565700.1 | 100 | 0 | 7  | 123 |  |

# 93 References

- 94 1. Borgonie, G. *et al.* Nematoda from the terrestrial deep subsurface of South Africa. *Nature*  
95 **474**, 79–82 (2011).
- 96 2. McMahon, S. & Parnell, J. Weighing the deep continental biosphere. *FEMS Microbiol. Ecol.*  
97 **87**, 113–120 (2014).
- 98 3. Lau, M. C. Y. *et al.* Phylogeny and phylogeography of functional genes shared among seven  
99 terrestrial subsurface metagenomes reveal N-cycling and microbial evolutionary  
100 relationships. *Front. Microbiol.* **5**, 531 (2014).
- 101 4. Fang, J., Kato, C., Runko, G. M., Nogi, Y. & Hori, T. Predominance of Viable Spore-  
102 Forming Piezophilic Bacteria in High-Pressure Enrichment Coal-Bearing Sediments below  
103 the Ocean Floor. *Front. Microbiol.* **8**, (2017).
- 104 5. Onstott, T. C. *et al.* Does aspartic acid racemization constrain the depth limit of the  
105 subsurface biosphere? *Geobiology* **12**, 1–19 (2014).
- 106 6. McMurdie, P. J. & Holmes, S. Phyloseq: An R Package for Reproducible Interactive  
107 Analysis and Graphics of Microbiome Census Data. *PLoS One* **8**, e61217 (2013).
- 108 7. Kumar, S., Stecher, G. & Tamura, K. MEGA7: Molecular Evolutionary Genetics Analysis  
109 Version 7.0 for Bigger Datasets. *Mol. Biol. Evol.* **33**, 1870–1874 (2016).
- 110 8. Edgar, R. C. MUSCLE: multiple sequence alignment with high accuracy and high  
111 throughput. *Nucleic Acids Res.* **32**, 1792–7 (2004).
- 112 9. Saitou, N. & Nei, M. The neighbor-joining method: a new method for reconstructing  
113 phylogenetic trees. *Mol. Biol. Evol.* **4**, 406–25 (1987).
- 114 10. Tamura, K., Nei, M. & Kumar, S. Prospects for inferring very large phylogenies by using the  
115 neighbor-joining method. *Proc. Natl. Acad. Sci.* **101**, 11030–11035 (2004).
- 116 11. Barnhart, E. P. *et al.* Hydrogeochemistry and coal-associated bacterial populations from a  
117 methanogenic coal bed. *Int. J. Coal Geol.* **162**, 14–26 (2016).
- 118 12. Foght, J. *et al.* Culturable Bacteria in Subglacial Sediments and Ice from Two Southern  
119 Hemisphere Glaciers. *Microb. Ecol.* **47**, 329–40 (2004).
- 120 13. Leuko, S. *et al.* Lysis efficiency of standard DNA extraction methods for *Halococcus* spp. in  
121 an organic rich environment. *Extremophiles* **12**, 301–308 (2008).

122
